# Supplementary material
Source: PubMed Central journal article supplement (PMC3474265)
Supplement: cn300105c_si_001.pdf [file cn300105c_si_001.pdf]

## **Supporting information for:**

### **Identification *in silico* and experimental validation of novel phosphodiesterase 7 inhibitors with efficacy in experimental autoimmune encephalomyelitis mice**

Miriam Redondo,<sup>a</sup> Valle Palomo,<sup>a</sup> José Brea,<sup>b</sup> Daniel I. Pérez,<sup>a</sup> Rocío Martín-Álvarez,<sup>c</sup> Concepción Pérez,<sup>a</sup> Nuria Paúl-Fernández,<sup>c</sup> Santiago Conde,<sup>a</sup> María Isabel Cadavid,<sup>b</sup> María Isabel Loza,<sup>b</sup> Guadalupe Mengod,<sup>c</sup> Ana Martínez,<sup>a</sup> Carmen Gil<sup>a,\*</sup>, Nuria E. Campillo<sup>a,\*</sup>

#### **Contents:**

- Page S2: PDE7A inhibitors structures
- Page S5: Reduction of dimensions.
- Page S8: Results of the initial NN models
- Page S9: Training set of NN3 model.
- Page S12: Workflow of the virtual screening procedure.
- Page S13: SMILE code and physicochemical property filters of the virtual screening compounds
- Page S22: Hidden neurons (input parameter) and activity prediction of the virtual screening compounds
- Page S28: Experimental results of the compounds from virtual screening
- Page S29: References

<sup>a</sup>Instituto de Química Médica (CSIC), Juan de la Cierva 3, 28006, Madrid (Spain)

<sup>b</sup>Instituto de Farmacia Industrial, Facultad de Farmacia, Universidad de Santiago de Compostela, Campus Universitario Sur s/n, 15782 Santiago de Compostela (Spain)

<sup>c</sup>Instituto de Investigaciones Biomédicas de Barcelona (CSIC-IDIBAPS-CIBERNED), Rosselló 161, 08036 Barcelona (Spain)

<sup>d</sup>Centro de Investigación Biomédica en Red sobre Enfermedades Neurodegenerativas (CIBERNED)

\* To whom correspondence should be addressed: N. E. Campillo or C. Gil, Phone: +34 91 5622900. Fax: +34 91 5644853. E-mail: nuria@suricata.iqm.csic.es or cgil@iqm.csic.es

**Table S1.** PDE7A inhibitors structures.

| Comp.              | R                                                                                | SMILES code                                                                                            |
|--------------------|----------------------------------------------------------------------------------|--------------------------------------------------------------------------------------------------------|
| I-1 <sup>1</sup>   | -                                                                                | <chem>CC1=C(C(OCC)=O)SC(NC2=NC(NC3ccc(OC)c(OC)c3)=C4C(N=CN4C<br/>C)=N2)=N1</chem>                      |
| I-2 <sup>2</sup>   | -                                                                                | <chem>Cc1ccc([N+](=O)[O-])cc1S(N(C)C)(=O)=O</chem>                                                     |
| I-3 <sup>1</sup>   | -                                                                                | <chem>CC1=C(C(OCC)=O)SC(NC2=NC(NC3ccc(S(N)(=O)=O)cc3)=C4C(N=C<br/>N4CC)=N2)=N1</chem>                  |
| I-4 <sup>3,4</sup> | Me                                                                               | <chem>Cle1cc(C(c2cc(c3ccc(OC)cc3)c(NS(c4ccc(C)cc4)(=O)=O)cc2)=NCC5)c5cc1</chem>                        |
| I-5 <sup>3,4</sup> | OCF <sub>3</sub>                                                                 | <chem>Cle1cc(C(c2cc(c3ccc(OC)cc3)c(NS(c4ccc(OC(F)(F)F)cc4)(=O)=O)cc2)=N<br/>CC5)c5cc1</chem>           |
| I-6 <sup>5</sup>   | 4-H                                                                              | <chem>Cle1c(NC(NC23CCCC3)=O)c2ccc1</chem>                                                              |
| I-7 <sup>6</sup>   | 3-Phenyl                                                                         | <chem>Cle1c(NC(NC23CCCC3)=O)c2cc(c4ccccc4)c1</chem>                                                    |
| I-8 <sup>6</sup>   | 1 <i>H</i> -Benzo[ <i>d</i> ]imidazole                                           | <chem>O=C(NC12CCCC2)Nc3c1cc(c4ccc5c(NC=N5)cc4)cc3C1</chem>                                             |
| I-9 <sup>7</sup>   | R <sup>1</sup> =4-Cl; R <sup>2</sup> =H                                          | <chem>Cle1ccc(C(S/2)=NN(C)C2=N/C3CCCC3)cc1</chem>                                                      |
| I-10 <sup>7</sup>  | R <sup>2</sup> =4-Cl; R <sup>6</sup> =3-COOH                                     | <chem>Cle1ccc(C(S/2)=NN(C)C2=N/c3cccc(C(O)=O)c3)cc1</chem>                                             |
| I-11 <sup>7</sup>  | R <sup>1</sup> =N-(Morpholinemethyl)acetyl.<br>R <sup>2</sup> =H                 | <chem>O=C(NCN1CCOCC1)c2ccc(C(S/3)=NN(C)C3=N/C4CCCC4)cc2</chem>                                         |
| I-12 <sup>8</sup>  | R <sup>6</sup> =3-OH (R,R); R <sup>2</sup> =4-CONH <sub>2</sub>                  | <chem>O=C(N)c1ccc(C(S/2)=NN(C)C2=N/[C@@H]3C[C@H](O)CCC3)cc1</chem>                                     |
| I-13 <sup>8</sup>  | R <sup>2</sup> =3-OH(R,R); R <sup>1</sup> =4-SO <sub>2</sub> Me                  | <chem>O[C@@H]1C[C@@H](/N=C2SC(c3ccc(S(=O)(C)=O)cc3)=NN/2C)CCC1</chem>                                  |
| I-14 <sup>9</sup>  | -                                                                                | <chem>O=S(c1ccc(N(C(c2cc(C)c(OC)cc2)=C3)C4=C3CC(N5CCN(C)CC5)CC4)cc<br/>1)(NC6=NC(C)=CC(C)=N6)=O</chem> |
| I-15 <sup>10</sup> | -                                                                                | <chem>O=C(OCC)C(S1)=C(C)N=C1NC2=NC(NC3ccc(OC)c(OC)c(OC)c3)=CC(C<br/>4CCC(N(C)C)CC4)=N2</chem>          |
| I-16 <sup>10</sup> | -                                                                                | <chem>O=C(OCC)C(S1)=C(C)N=C1NC2=NC(C3CCC(O)CC3)=CC(C4CCC(O)C<br/>C4)=N2</chem>                         |
| I-17 <sup>10</sup> | -                                                                                | <chem>O=C1N(C2=NC(C3=CC=CS3)=NS2)N=C(c4cc(Cl)c(OC)cc4)C5CC=CCC51</chem>                                |
| I-18 <sup>11</sup> | -                                                                                | <chem>S=C(c1cccc(C)c1N2)N(c3cccc3)C2=S</chem>                                                          |
| I-19 <sup>6</sup>  | CH <sub>2</sub> CH <sub>2</sub> OH                                               | <chem>Cle1c(NC(NC23CCCC3)=O)c2c(OCCO)cc1</chem>                                                        |
| I-20 <sup>6</sup>  | CH <sub>2</sub> -5-CO <sub>2</sub> -Et-furan-2-yl                                | <chem>Cle1c(NC(NC23CCCC3)=O)c2c(OCC4=C(C(OCC)=O)C=CO4)cc1</chem>                                       |
| I-21 <sup>6</sup>  | CH <sub>2</sub> -1 <i>H</i> -tetrazole-5-yl                                      | <chem>O=C1NC2=C(Cl)C=CC(OCC3=NN=NN3)=C2C4(CCCCC4)N1</chem>                                             |
| I-22 <sup>6</sup>  | CH <sub>2</sub> -5-OH-[1.2.4]oxadiazole-3-yl                                     | <chem>O=C1NC2=C(Cl)C=CC(OCC3=NOC(O)=N3)=C2C4(CCCCC4)N1</chem>                                          |
| I-23 <sup>6</sup>  | CH <sub>2</sub> -5-CO <sub>2</sub> H-furan-2-yl                                  | <chem>Cle1c(NC(NC23CCCC3)=O)c2c(OCC4=C(C(O)=O)C=CO4)cc1</chem>                                         |
| I-24 <sup>6</sup>  | CH <sub>2</sub> CH <sub>2</sub> CH <sub>2</sub> SO <sub>3</sub> H                | <chem>Cle1c(NC(NC23CCCC3)=O)c2c(OCCCS(=O)(O)=O)cc1</chem>                                              |
| I-25 <sup>6</sup>  | CH <sub>2</sub> CH <sub>2</sub> -4-morpholine                                    | <chem>O=C1NC2=C(Cl)C=CC(OCCN3CCOCC3)=C2C4(CCCCC4)N1</chem>                                             |
| I-26 <sup>6</sup>  | CH <sub>2</sub> CH <sub>2</sub> NHMe                                             | <chem>Cle1c(NC(NC23CCCC3)=O)c2c(OCCNC)cc1</chem>                                                       |
| I-27 <sup>6</sup>  | CH <sub>2</sub> CH <sub>2</sub> NMe <sub>2</sub>                                 | <chem>Cle1c(NC(NC23CCCC3)=O)c2c(OCCN(C)C)cc1</chem>                                                    |
| I-28 <sup>6</sup>  | CH <sub>2</sub> CH <sub>2</sub> OCH <sub>2</sub> CH <sub>2</sub> NH <sub>2</sub> | <chem>Cle1c(NC(NC23CCCC3)=O)c2c(OCCOCCN)cc1</chem>                                                     |
| I-29 <sup>6</sup>  | CH <sub>2</sub> CHOH CH <sub>2</sub> NHMe                                        | <chem>Cle1c(NC(NC23CCCC3)=O)c2c(OCC(CNC)O)cc1</chem>                                                   |
| I-30 <sup>6</sup>  | CH <sub>2</sub> CHOHCH <sub>2</sub> NMe <sub>2</sub>                             | <chem>Cle1c(NC(NC23CCCC3)=O)c2c(OCC(CN(C)C)O)cc1</chem>                                                |
| I-31 <sup>6</sup>  | CH <sub>2</sub> CH <sub>2</sub> NHCH <sub>2</sub> CO <sub>2</sub> H              | <chem>Cle1c(NC(NC23CCCC3)=O)c2c(OCCNCC(O)=O)cc1</chem>                                                 |

| Comp.              | R                                                                                       | SMILES code                                                           |
|--------------------|-----------------------------------------------------------------------------------------|-----------------------------------------------------------------------|
| I-32 <sup>6</sup>  | 4-Me                                                                                    | <chem>Clc1c(NC(NC23CCCCC3)=O)c2c(C)cc1</chem>                         |
| I-33 <sup>6</sup>  | 4-OMe                                                                                   | <chem>Clc1c(NC(NC23CCCCC3)=O)c2c(OC)cc1</chem>                        |
| I-34 <sup>5</sup>  | 8-F                                                                                     | <chem>O=C(NC12CCCCC2)Nc3c1ccccc3F</chem>                              |
| I-35 <sup>5</sup>  | 8-Br                                                                                    | <chem>O=C(NC12CCCCC2)Nc3c1ccccc3Br</chem>                             |
| I-36 <sup>5</sup>  | 8-CH <sub>3</sub>                                                                       | <chem>O=C(NC12CCCCC2)Nc3c1ccccc3C</chem>                              |
| I-37 <sup>5</sup>  | 6-Ph                                                                                    | <chem>O=C(NC12CCCCC1)Nc3c2cc(C4=CC=CC=C4)cc3</chem>                   |
| I-38 <sup>5</sup>  | 5-Cl                                                                                    | <chem>O=C(NC12CCCCC1)Nc3c2c(Cl)ccc3</chem>                            |
| I-39 <sup>5</sup>  | 5,6-diCl                                                                                | <chem>O=C(NC12CCCCC1)Nc3c2c(Cl)c(Cl)cc3</chem>                        |
| I-40 <sup>5</sup>  | 6,8-diCl                                                                                | <chem>O=C(NC12CCCCC1)Nc3c2cc(Cl)cc3Cl</chem>                          |
| I-41 <sup>5</sup>  | 6-Me-8-Cl                                                                               | <chem>O=C(NC12CCCCC1)Nc3c2cc(C)cc3Cl</chem>                           |
| I-42 <sup>5</sup>  | 6-OMe-8-Cl                                                                              | <chem>O=C(NC12CCCCC1)Nc3c2cc(OC)cc3Cl</chem>                          |
| I-43 <sup>5</sup>  | 4-Methylspirocyclohexyl                                                                 | <chem>O=C(NC12CCC(C)CC2)Nc3c1ccccc3Br</chem>                          |
| I-44 <sup>5</sup>  | p-C <sub>6</sub> H <sub>4</sub> -CO <sub>2</sub> H                                      | <chem>O=C(NC12CCCCC2)Nc3c1cc(c4cccc(C(O)=O)cc4)cc3Cl</chem>           |
| I-45 <sup>5</sup>  | m-C <sub>6</sub> H <sub>4</sub> -CO <sub>2</sub> H                                      | <chem>O=C(NC12CCCCC2)Nc3c1cc(c4cccc(C(O)=O)c4)cc3Cl</chem>            |
| I-46 <sup>5</sup>  | p-C <sub>6</sub> H <sub>4</sub> -CONH <sub>2</sub>                                      | <chem>O=C(NC12CCCCC2)Nc3c1cc(c4cccc(C(N)=O)cc4)cc3Cl</chem>           |
| I-47 <sup>5</sup>  | p-C <sub>6</sub> H <sub>4</sub> -CONH-(CH <sub>2</sub> ) <sub>2</sub> -NMe <sub>2</sub> | <chem>O=C(NC12CCCCC2)Nc3c1cc(c4cccc(C(NCCN(C)C)=O)cc4)cc3Cl</chem>    |
| I-48 <sup>5</sup>  | m-C <sub>6</sub> H <sub>4</sub> -CONH-(CH <sub>2</sub> ) <sub>2</sub> -NMe <sub>2</sub> | <chem>O=C(NC12CCCCC2)Nc3c1cc(c4cccc(C(NCCN(C)C)=O)c4)cc3Cl</chem>     |
| I-49 <sup>5</sup>  | p-C <sub>6</sub> H <sub>4</sub> -CONH-(CH <sub>2</sub> ) <sub>3</sub> -NMe <sub>2</sub> | <chem>O=C(NC12CCCCC2)Nc3c1cc(c4cccc(C(NCCCN(C)C)=O)cc4)cc3Cl</chem>   |
| I-50 <sup>5</sup>  | m-C <sub>6</sub> H <sub>4</sub> -CONH-(CH <sub>2</sub> ) <sub>3</sub> -NMe <sub>2</sub> | <chem>O=C(NC12CCCCC2)Nc3c1cc(c4cccc(C(NCCCN(C)C)=O)c4)cc3Cl</chem>    |
| I-51 <sup>5</sup>  | p-C <sub>6</sub> H <sub>4</sub> -CO-N-Methylpiperazine                                  | <chem>O=C(NC12CCCCC2)Nc3c1cc(c4cccc(C(N5CCN(C)CC5)=O)cc4)cc3Cl</chem> |
| I-52 <sup>5</sup>  | m-C <sub>6</sub> H <sub>4</sub> -CO-N-Methylpiperazine                                  | <chem>O=C(NC12CCCCC2)Nc3c1cc(c4cccc(C(N5CCN(C)CC5)=O)c4)cc3Cl</chem>  |
| I-53 <sup>12</sup> | R <sup>1</sup> =4-SO <sub>2</sub> Me; R <sup>2</sup> =H                                 | <chem>CN(N=C(c1ccccc1)S/2)C2=N\c3cc(C(O)=O)c(S(=O)(C)=O)cc3</chem>    |
| I-54 <sup>12</sup> | R <sup>1</sup> =3-CN; R <sup>2</sup> =H                                                 | <chem>CN(N=C(c1ccccc1)S/2)C2=N\c3cc(C(O)=O)cc(C#N)c3</chem>           |
| I-55 <sup>12</sup> | R <sup>2</sup> =H; R <sup>1</sup> =4-CO(4-methyl-piperazin-1-yl)                        | <chem>CN1N=C(c2ccc(C(N3CCN(C)CC3)=O)cc2)S/C1=N/C4CCCCC4</chem>        |
| I-56 <sup>12</sup> | R <sup>2</sup> =3-OH trans<br>R <sup>1</sup> =4-CONH(2-hydroxy-1,1-dimethylethyl)       | <chem>CN1N=C(c2ccc(C(NC(C)C)CO)=O)cc2)S/C1=N/[C@H]3CCCC(O)C3</chem>   |
| I-57 <sup>12</sup> | R <sup>2</sup> =3-OH trans R <sup>1</sup> =4-NHCOMe                                     | <chem>CN1N=C(c2ccc(NC(C)=O)cc2)S/C1=N/[C@H]3CCCC(O)C3</chem>          |
| I-58 <sup>12</sup> | R <sup>2</sup> =3-OH trans R <sup>1</sup> =4-SO <sub>2</sub> Me                         | <chem>CN1N=C(c2ccc(S(C)=O)cc2)S/C1=N/[C@H]3CCCC(O)C3</chem>           |
| I-59 <sup>12</sup> | 2-OH cis                                                                                | <chem>CN1/C(SC(c2ccc(C(N)=O)cc2)=N1)=N/[C@H]3CCCCC3O</chem>           |
| I-60 <sup>12</sup> | 4-OH trans                                                                              | <chem>CN1/C(SC(c2ccc(C(N)=O)cc2)=N1)=N\C3CCC(O)CC3</chem>             |
| I-61 <sup>12</sup> | 3-OH cis                                                                                | <chem>CN1/C(SC(c2ccc(C(N)=O)cc2)=N1)=N/[C@H]3CCCC(O)C3</chem>         |
| I-62 <sup>12</sup> | 3-OH trans                                                                              | <chem>CN1/C(SC(c2ccc(C(N)=O)cc2)=N1)=N/[C@H]3CC(O)CCC3</chem>         |
| I-63 <sup>12</sup> | 3-OH (R,R)                                                                              | <chem>CN1/C(SC(c2ccc(C(N)=O)cc2)=N1)=N/[C@H]3CCC[C@H](O)C3</chem>     |
| I-64 <sup>7</sup>  | Bicycle[2,2,1] hept-2-yl                                                                | <chem>Clc1ccc(C(S/2)=NN(C)C2=N/C3C(C4)CCC4C3)cc1</chem>               |
| I-65 <sup>7</sup>  | 2-Hydroxy-1,1-dimethylethyl                                                             | <chem>Clc1ccc(C(S/2)=NN(C)C2=N\C(C)C)CO)cc1</chem>                    |
| I-66 <sup>7</sup>  | Phenyl                                                                                  | <chem>Clc1ccc(C(S/2)=NN(C)C2=N\C3=CC=CC=C3)cc1</chem>                 |
| I-67 <sup>7</sup>  | 3-OH                                                                                    | <chem>Clc1ccc(C(S/2)=NN(C)C2=N\c3cc(O)ccc3)cc1</chem>                 |
| I-68 <sup>7</sup>  | 3-(2H-tetrazol-5-yl)                                                                    | <chem>Clc1ccc(C(S/2)=NN(C)C2=N\c3cc(C4=NNN=N4)ccc3)cc1</chem>         |

| Comp.             | R                                                      | SMILES code                                                      |
|-------------------|--------------------------------------------------------|------------------------------------------------------------------|
| I-69 <sup>7</sup> | 3-CONH <sub>2</sub>                                    | <chem>Clc1ccc(C(S/2)=NN(C)C2=N\c3cc(C(N)=O)ccc3)cc1</chem>       |
| I-70 <sup>7</sup> | 4-OH                                                   | <chem>Clc1ccc(C(S/2)=NN(C)C2=N\c3ccc(O)cc3)cc1</chem>            |
| I-71 <sup>7</sup> | 4-F                                                    | <chem>Clc1ccc(C(S/2)=NN(C)C2=N\c3ccc(F)cc3)cc1</chem>            |
| I-72 <sup>7</sup> | 2-OH, 5-COOH                                           | <chem>Clc1ccc(C(S/2)=NN(C)C2=N\c3c(O)ccc(C(O)=O)c3)cc1</chem>    |
| I-73 <sup>7</sup> | 2-OH, 3-COOH                                           | <chem>Clc1ccc(C(S/2)=NN(C)C2=N\c3c(O)c(C(O)=O)ccc3)cc1</chem>    |
| I-74 <sup>7</sup> | 3-COOH, 4-F                                            | <chem>Clc1ccc(C(S/2)=NN(C)C2=N\c3cc(C(O)=O)c(F)cc3)cc1</chem>    |
| I-75 <sup>7</sup> | 4,7-Dimethyl quinazoline                               | <chem>CN(N=C(C1=CC=C(C(C)=NC=N2)C2=C1)S/3)C3=N\c4CCCCC4</chem>   |
| I-76 <sup>7</sup> | 2-Cl                                                   | <chem>CN1/C(SC(c2c(Cl)cccc2)=N1)=N/C3CCCCC3</chem>               |
| I-77 <sup>7</sup> | 3-OH                                                   | <chem>CN1/C(SC(c2cc(O)ccc2)=N1)=N/C3CCCCC3</chem>                |
| I-78 <sup>7</sup> | 3-Cl                                                   | <chem>CN1/C(SC(c2cc(Cl)ccc2)=N1)=N/C3CCCCC3</chem>               |
| I-79 <sup>7</sup> | 3-SO <sub>2</sub> NH <sub>2</sub>                      | <chem>CN1/C(SC(c2cc(S(=O)(N)=O)ccc2)=N1)=N/C3CCCCC3</chem>       |
| I-80 <sup>7</sup> | 3-CONH <sub>2</sub>                                    | <chem>CN1/C(SC(c2cc(C(N)=O)ccc2)=N1)=N/C3CCCCC3</chem>           |
| I-81 <sup>7</sup> | 3-COOH                                                 | <chem>CN1/C(SC(c2cc(C(O)=O)ccc2)=N1)=N/C3CCCCC3</chem>           |
| I-82 <sup>7</sup> | 4-OH                                                   | <chem>CN1/C(SC(c2ccc(O)cc2)=N1)=N/C3CCCCC3</chem>                |
| I-83 <sup>7</sup> | 4-COOMe                                                | <chem>CN1/C(SC(c2ccc(C(OC)=O)cc2)=N1)=N/C3CCCCC3</chem>          |
| I-84 <sup>7</sup> | 4-Cl                                                   | <chem>CN1/C(SC(c2ccc(Cl)cc2)=N1)=N/C3CCCCC3</chem>               |
| I-85 <sup>7</sup> | 4-COOH                                                 | <chem>CN1/C(SC(c2ccc(C(O)=O)cc2)=N1)=N/C3CCCCC3</chem>           |
| I-86 <sup>7</sup> | 4-NH <sub>2</sub>                                      | <chem>CN1/C(SC(c2ccc(N)cc2)=N1)=N/C3CCCCC3</chem>                |
| I-87 <sup>7</sup> | 3-Me, 4-CONH <sub>2</sub>                              | <chem>CN1/C(SC(c2cc(C)c(C(N)=O)cc2)=N1)=N/C3CCCCC3</chem>        |
| I-88 <sup>7</sup> | 3-OMe, 4-CONH <sub>2</sub>                             | <chem>CN1/C(SC(c2cc(OC)c(C(N)=O)cc2)=N1)=N/C3CCCCC3</chem>       |
| I-89 <sup>7</sup> | 3-SO <sub>2</sub> NH <sub>2</sub> , 4-Cl               | <chem>CN1/C(SC(c2cc(S(N)(=O)=O)c(Cl)cc2)=N1)=N/C3CCCCC3</chem>   |
| I-90 <sup>7</sup> | 3-SO <sub>2</sub> NHEt, 4-Cl                           | <chem>CN1/C(SC(c2cc(S(NCC)(=O)=O)c(Cl)cc2)=N1)=N/C3CCCCC3</chem> |
| I-91 <sup>7</sup> | 4-CONHCH <sub>2</sub> CH <sub>3</sub> -N-morpholinyl   | <chem>CN1/C(SC(c2ccc(C(NCCN3CCOCC3)=O)cc2)=N1)=N/C4CCCCC4</chem> |
| I-92 <sup>7</sup> | 4-CONHCH <sub>2</sub> N(CH <sub>3</sub> ) <sub>2</sub> | <chem>CN1/C(SC(c2ccc(C(NCCN(C)C)=O)cc2)=N1)=N/C3CCCCC3</chem>    |

**Table S2.** After reduction of dimension: hidden neurons for each molecule.

| <b>Comp.</b> | <b>IC<sub>50</sub> (μM)</b> | <b>A</b> | <b>B</b> | <b>C</b> | <b>D</b> |
|--------------|-----------------------------|----------|----------|----------|----------|
| <b>I-1</b>   | 0.15                        | 0.824805 | 0.02059  | 0.027546 | 0.020005 |
| <b>I-2</b>   | 0.03                        | 0.987969 | 0.040606 | 0.031817 | 0.992433 |
| <b>I-3</b>   | 0.01                        | 0.025064 | 0.018587 | 0.871014 | 0.025251 |
| <b>I-4</b>   | 0.12                        | 0.907033 | 0.026002 | 0.009621 | 0.023997 |
| <b>I-5</b>   | 0.03                        | 0.883312 | 0.031732 | 0.028993 | 0.033764 |
| <b>I-6</b>   | 0.17                        | 0.915279 | 0.99687  | 0.986983 | 0.960851 |
| <b>I-7</b>   | 0.02                        | 0.697131 | 0.750226 | 0.995709 | 0.997673 |
| <b>I-8</b>   | 0.01                        | 0.076401 | 0.937887 | 0.000907 | 0.007127 |
| <b>I-9</b>   | 1.5                         | 0.412103 | 0.895437 | 0.903391 | 0.255357 |
| <b>I-10</b>  | 0.14                        | 0.093917 | 0.997256 | 0.89745  | 0.961969 |
| <b>I-11</b>  | 0.03                        | 0.904289 | 0.046262 | 0.027739 | 0.050401 |
| <b>I-12</b>  | 0.08                        | 0.084001 | 0.690593 | 0.116325 | 0.049928 |
| <b>I-13</b>  | 0.05                        | 0.785893 | 0.003162 | 0.064435 | 0.008843 |
| <b>I-14</b>  | 0.01                        | 0.777262 | 0.004367 | 0.006458 | 0.021562 |
| <b>I-15</b>  | 0.03                        | 0.010845 | 0.00676  | 0.006454 | 0.809156 |
| <b>I-16</b>  | 0.06                        | 0.026129 | 0.921301 | 0.023752 | 0.022828 |
| <b>I-17</b>  | 0.08                        | 0.314084 | 0.071012 | 0.068357 | 0.262474 |
| <b>I-18</b>  | 1                           | 0.994101 | 0.980303 | 0.990388 | 0.98975  |
| <b>I-19</b>  | 0.05                        | 0.358922 | 0.962927 | 0.889166 | 0.104338 |
| <b>I-20</b>  | 0.01                        | 0.869406 | 0.027862 | 0.010168 | 0.030562 |
| <b>I-21</b>  | 0.01                        | 0.415963 | 0.569516 | 0.98084  | 0.741146 |
| <b>I-22</b>  | 0.01                        | 0.415963 | 0.569516 | 0.98084  | 0.741146 |
| <b>I-23</b>  | 0.02                        | 0.929689 | 0.005872 | 0.017627 | 0.038603 |
| <b>I-24</b>  | 0.02                        | 0.674565 | 0.000232 | 0.00257  | 0.039804 |
| <b>I-25</b>  | 0.04                        | 0.001904 | 0.004098 | 0.895127 | 0.041666 |
| <b>I-26</b>  | 0.93                        | 0.97251  | 0.965634 | 0.339512 | 0.996595 |
| <b>I-27</b>  | 0.16                        | 0.922049 | 0.884639 | 0.244723 | 0.59938  |
| <b>I-28</b>  | 1.62                        | 0.205381 | 0.884517 | 0.624457 | 0.510516 |
| <b>I-29</b>  | 0.21                        | 0.977827 | 0.937339 | 0.317506 | 0.619464 |
| <b>I-30</b>  | 0.40                        | 0.014395 | 0.337643 | 0.134946 | 0.483521 |
| <b>I-31</b>  | 0.04                        | 0.002671 | 0.751227 | 0.203597 | 0.003908 |
| <b>I-32</b>  | 0.10                        | 0.036175 | 0.500084 | 0.277307 | 0.675212 |
| <b>I-33</b>  | 0.01                        | 0.11241  | 0.26918  | 0.738229 | 0.577431 |

| <b>Comp.</b> | <b>IC<sub>50</sub> (μM)</b> | <b>A</b> | <b>B</b> | <b>C</b> | <b>D</b> |
|--------------|-----------------------------|----------|----------|----------|----------|
| <b>I-34</b>  | 0.39                        | 0.205862 | 0.904151 | 0.244813 | 0.892184 |
| <b>I-35</b>  | 0.06                        | 0.863481 | 0.952994 | 0.96858  | 0.956333 |
| <b>I-36</b>  | 0.79                        | 0.324064 | 0.328639 | 0.309182 | 0.766063 |
| <b>I-37</b>  | 0.98                        | 0.576614 | 0.825674 | 0.725045 | 0.943223 |
| <b>I-38</b>  | 0.84                        | 0.977764 | 0.983828 | 0.970171 | 0.182014 |
| <b>I-39</b>  | 0.60                        | 0.942604 | 0.878549 | 0.998111 | 0.995413 |
| <b>I-40</b>  | 0.12                        | 0.947401 | 0.999983 | 0.858211 | 0.062039 |
| <b>I-41</b>  | 0.16                        | 0.813252 | 0.945594 | 0.096404 | 0.934502 |
| <b>I-42</b>  | 0.16                        | 0.741634 | 0.066536 | 0.130777 | 0.795944 |
| <b>I-43</b>  | 0.21                        | 0.741634 | 0.066536 | 0.130777 | 0.795944 |
| <b>I-44</b>  | 0.01                        | 0.069645 | 0.000483 | 0.000462 | 0.931533 |
| <b>I-45</b>  | 0.03                        | 0.935083 | 0.111989 | 9.2e-005 | 0.027029 |
| <b>I-46</b>  | 0.02                        | 0.931749 | 0.000223 | 0.000394 | 0.04961  |
| <b>I-47</b>  | 0.02                        | 0.02554  | 0.017693 | 0.021401 | 0.924596 |
| <b>I-48</b>  | 0.03                        | 0.872382 | 0.028165 | 0.022261 | 0.032033 |
| <b>I-49</b>  | 0.02                        | 0.917655 | 0.021888 | 0.015164 | 0.018502 |
| <b>I-50</b>  | 0.02                        | 0.03575  | 0.030505 | 0.793042 | 0.008289 |
| <b>I-51</b>  | 0.01                        | 0.04695  | 0.828941 | 0.014169 | 0.01704  |
| <b>I-52</b>  | 0.04                        | 0.018492 | 0.020606 | 0.015912 | 0.928709 |
| <b>I-53</b>  | 0.12                        | 0.903026 | 0.032933 | 0.001079 | 0.001201 |
| <b>I-54</b>  | 0.19                        | 0.990421 | 0.710036 | 0.114675 | 0.869108 |
| <b>I-55</b>  | 0.42                        | 0.841383 | 0.048273 | 0.064642 | 0.005665 |
| <b>I-56</b>  | 0.38                        | 0.035568 | 0.0494   | 0.035207 | 0.797716 |
| <b>I-57</b>  | 0.08                        | 0.004051 | 0.083507 | 0.002876 | 0.735232 |
| <b>I-58</b>  | 0.31                        | 0.014364 | 0.008668 | 0.15499  | 0.687601 |
| <b>I-59</b>  | 0.61                        | 0.989786 | 0.447801 | 0.992606 | 0.982077 |
| <b>I-60</b>  | 0.19                        | 0.923775 | 0.997781 | 0.916581 | 0.996271 |
| <b>I-61</b>  | 1.65                        | 0.156536 | 0.991634 | 0.982831 | 0.848269 |
| <b>I-62</b>  | 0.19                        | 0.003846 | 0.790941 | 0.101716 | 0.01472  |
| <b>I-63</b>  | 0.08                        | 0.927896 | 0.000554 | 0.009228 | 0.189424 |
| <b>I-64</b>  | 1.05                        | 0.966081 | 0.973558 | 0.941785 | 0.396351 |
| <b>I-65</b>  | 1.9                         | 0.972448 | 0.905577 | 0.803425 | 0.99066  |
| <b>I-66</b>  | 2.95                        | 0.958872 | 0.994647 | 0.99674  | 0.680187 |
| <b>I-67</b>  | 1.80                        | 0.996775 | 0.59624  | 0.996873 | 0.625385 |
| <b>I-68</b>  | 0.08                        | 0.005805 | 0.002796 | 0.836009 | 0.191127 |

| <b>Comp.</b> | <b>IC<sub>50</sub> (μM)</b> | <b>A</b> | <b>B</b> | <b>C</b> | <b>D</b> |
|--------------|-----------------------------|----------|----------|----------|----------|
| <b>I-69</b>  | 1.63                        | 0.967967 | 0.062628 | 0.99622  | 0.899858 |
| <b>I-70</b>  | 1.70                        | 0.980339 | 0.805035 | 0.998617 | 0.539458 |
| <b>I-71</b>  | 2.20                        | 0.972624 | 0.380912 | 0.994297 | 0.859654 |
| <b>I-72</b>  | 1.31                        | 0.02755  | 0.105842 | 0.065059 | 0.738752 |
| <b>I-73</b>  | 0.26                        | 0.002131 | 0.039907 | 0.708103 | 0.200532 |
| <b>I-74</b>  | 0.16                        | 0.01536  | 0.162492 | 0.006681 | 0.54921  |
| <b>I-75</b>  | 0.04                        | 0.052292 | 0.749734 | 0.9909   | 0.918103 |
| <b>I-76</b>  | 1.30                        | 0.667457 | 0.539127 | 0.536442 | 0.356475 |
| <b>I-77</b>  | 0.29                        | 0.762825 | 0.179308 | 0.144207 | 0.940531 |
| <b>I-78</b>  | 0.70                        | 0.334175 | 0.264264 | 0.5376   | 0.830523 |
| <b>I-79</b>  | 0.20                        | 0.92284  | 0.723142 | 0.738779 | 0.093847 |
| <b>I-80</b>  | 0.09                        | 0.940884 | 0.20657  | 0.159968 | 0.95938  |
| <b>I-81</b>  | 0.87                        | 0.935618 | 0.156566 | 0.318913 | 0.927962 |
| <b>I-82</b>  | 0.24                        | 0.490779 | 0.31032  | 0.969575 | 0.317776 |
| <b>I-83</b>  | 0.23                        | 0.999557 | 0.996463 | 0.981316 | 0.930724 |
| <b>I-84</b>  | 1.50                        | 0.892315 | 0.161231 | 0.777029 | 0.259727 |
| <b>I-85</b>  | 0.55                        | 0.476255 | 0.600632 | 0.846401 | 0.358308 |
| <b>I-86</b>  | 0.56                        | 0.978523 | 0.992109 | 0.987195 | 0.585795 |
| <b>I-87</b>  | 0.93                        | 0.988915 | 0.553073 | 0.963968 | 0.989638 |
| <b>I-88</b>  | 0.47                        | 0.992063 | 0.942551 | 0.989754 | 0.772288 |
| <b>I-89</b>  | 0.07                        | 0.316334 | 0.013032 | 0.112718 | 0.002728 |
| <b>I-90</b>  | 0.02                        | 0.009368 | 0.920609 | 0.004644 | 0.028857 |
| <b>I-91</b>  | 0.03                        | 0.023512 | 0.00926  | 0.913369 | 0.01728  |
| <b>I-92</b>  | 0.06                        | 0.074753 | 0.405584 | 0.050186 | 0.066867 |

**Table S3.** Cluster analysis of training and test set of model 1.

| <i>Predicted</i> | <i>Training</i>     |                 |               | <i>Test</i>     |                 |               |
|------------------|---------------------|-----------------|---------------|-----------------|-----------------|---------------|
|                  | <i>Experimental</i> |                 |               |                 |                 |               |
|                  | <i>Inactive</i>     | <i>Moderate</i> | <i>Active</i> | <i>Inactive</i> | <i>Moderate</i> | <i>Active</i> |
| <i>Active</i>    | 9 %                 | 8 %             | 75 %          | 5 %             | 27 %            | 60 %          |
| <i>Moderate</i>  | 31 %                | 55 %            | -             | 55 %            | 46 %            | -             |
| <i>Inactive</i>  | 60 %                | 37 %            | -             | 40 %            | 26 %            | -             |

**Table S4.** Statistical parameters of training and test set model 1.

|            | <b>Training set</b> | <b>Test set</b> |
|------------|---------------------|-----------------|
| <b>FC</b>  | 100 %               | 45 %            |
| <b>FAR</b> | 0 %                 | 27 %            |
| <b>POD</b> | 98 %                | 96 %            |

(FC) Fraction correct. (FAR) False alarm rate.

(POD) Probability of detection.



**Table S5.** Training set of NNE3 model.

| <b>Comp.</b> | <b>Quantitative analysis</b> |                    | <b>Qualitative analysis</b> |                    |
|--------------|------------------------------|--------------------|-----------------------------|--------------------|
|              | <b>Log IC<sub>50</sub></b>   | <b>Theoretical</b> | <b>Experimental</b>         | <b>Theoretical</b> |
| <b>I-25</b>  | -1.4202                      | -1.7242            | 1                           | 1                  |
| <b>I-73</b>  | -0.585                       | -1.1484            | 0                           | 1                  |
| <b>I-31</b>  | -1.3768                      | -0.9403            | 1                           | 0                  |
| <b>I-62</b>  | -0.7212                      | -0.9746            | 0                           | 0                  |
| <b>I-57</b>  | -1.0706                      | -0.802             | 1                           | 0                  |
| <b>I-68</b>  | -1.0969                      | -1.3853            | 1                           | 1                  |
| <b>I-90</b>  | -1.6576                      | -1.3782            | 1                           | 1                  |
| <b>I-15</b>  | -1.5229                      | -1.2288            | 1                           | 1                  |
| <b>I-58</b>  | -0.5086                      | -0.249             | 0                           | 0                  |
| <b>I-30</b>  | -0.3979                      | -0.4022            | 0                           | 0                  |
| <b>I-74</b>  | -0.7959                      | -0.5412            | 0                           | 0                  |
| <b>I-52</b>  | -1.3566                      | -1.3995            | 1                           | 1                  |
| <b>I-91</b>  | -1.5229                      | -1.8016            | 1                           | 1                  |
| <b>I-3</b>   | -2                           | -1.7836            | 1                           | 1                  |
| <b>I-47</b>  | -1.6778                      | -1.3457            | 1                           | 1                  |
| <b>I-16</b>  | -1.2219                      | -1.4873            | 1                           | 1                  |
| <b>I-72</b>  | 0.1173                       | -0.32              | -1                          | 0                  |
| <b>I-56</b>  | -0.4202                      | -0.7523            | 0                           | 0                  |
| <b>I-50</b>  | -1.7213                      | -1.7777            | 1                           | 1                  |
| <b>I-32</b>  | -1                           | -0.4568            | 1                           | 0                  |
| <b>I-51</b>  | -1.8539                      | -1.4563            | 1                           | 1                  |
| <b>I-75</b>  | -1.5686                      | -1.1323            | 1                           | 1                  |
| <b>I-44</b>  | -1.8861                      | -1.5321            | 1                           | 1                  |
| <b>I-92</b>  | -1.2007                      | -0.6968            | 1                           | 0                  |

| <b>Comp.</b> | <b>Quantitative analysis</b> |                    | <b>Qualitative analysis</b> |                    |
|--------------|------------------------------|--------------------|-----------------------------|--------------------|
|              | <b>Log IC<sub>50</sub></b>   | <b>Theoretical</b> | <b>Experimental</b>         | <b>Theoretical</b> |
| <b>I-12</b>  | -1.0555                      | -0.8912            | 1                           | 0                  |
| <b>I-10</b>  | -0.8539                      | -0.5548            | 0                           | 0                  |
| <b>I-33</b>  | -1.8539                      | -1.611             | 1                           | 1                  |
| <b>I-61</b>  | 0.2175                       | -0.2591            | -1                          | 0                  |
| <b>I-28</b>  | 0.2095                       | -0.1251            | -1                          | 0                  |
| <b>I-34</b>  | -0.4089                      | -0.6351            | 0                           | 0                  |
| <b>I-17</b>  | -1.1024                      | -0.8584            | 1                           | 0                  |
| <b>I-89</b>  | -1.1612                      | -1.2677            | 1                           | 1                  |
| <b>I-36</b>  | -0.1024                      | -0.0163            | 0                           | 0                  |
| <b>I-78</b>  | -0.1549                      | -0.1698            | 0                           | 0                  |
| <b>I-19</b>  | -1.2596                      | -0.7644            | 1                           | 0                  |
| <b>I-83</b>  | -0.6383                      | -0.378             | 0                           | 0                  |
| <b>I-9</b>   | 0.1761                       | -0.0659            | -1                          | 0                  |
| <b>I-21</b>  | -2.3979                      | -2.0685            | 1                           | 1                  |
| <b>I-22</b>  | -2.4559                      | -2.0685            | 1                           | 1                  |
| <b>I-85</b>  | -0.2596                      | -0.3773            | 0                           | 0                  |
| <b>I-49</b>  | -1.6198                      | -1.2667            | 1                           | 1                  |
| <b>I-27</b>  | -0.8041                      | -0.6087            | 0                           | 0                  |
| <b>I-79</b>  | -0.699                       | -0.4791            | 0                           | 0                  |
| <b>I-60</b>  | -0.7212                      | -0.3459            | 0                           | 0                  |
| <b>I-63</b>  | -1.0555                      | -1.4179            | 1                           | 1                  |
| <b>I-23</b>  | -1.7959                      | -1.333             | 1                           | 1                  |
| <b>I-46</b>  | -1.699                       | -1.4888            | 1                           | 1                  |
| <b>I-45</b>  | -1.6021                      | -1.0669            | 1                           | 1                  |
| <b>I-81</b>  | -0.0605                      | -0.1542            | 0                           | 0                  |

| <b>Comp.</b> | <b>Quantitative analysis</b> |                    | <b>Qualitative analysis</b> |                    |
|--------------|------------------------------|--------------------|-----------------------------|--------------------|
|              | <b>Log IC<sub>50</sub></b>   | <b>Theoretical</b> | <b>Experimental</b>         | <b>Theoretical</b> |
| <b>I-39</b>  | -0.2218                      | -0.5704            | 0                           | 0                  |
| <b>I-40</b>  | -0.9208                      | -0.7238            | 0                           | 0                  |
| <b>I-66</b>  | 0.4698                       | -0.0622            | -1                          | 0                  |
| <b>I-64</b>  | 0.0212                       | 0.2194             | -1                          | -1                 |
| <b>I-69</b>  | 0.2122                       | 0.3445             | -1                          | -1                 |
| <b>I-65</b>  | 0.2788                       | -0.195             | -1                          | 0                  |
| <b>I-26</b>  | -0.0146                      | -0.2573            | 0                           | 0                  |
| <b>I-71</b>  | 0.3424                       | 0.1197             | -1                          | -1                 |
| <b>I-38</b>  | -0.0757                      | -0.116             | 0                           | 0                  |
| <b>I-29</b>  | -0.6716                      | -0.5493            | 0                           | 0                  |
| <b>I-86</b>  | -0.2518                      | 0.1696             | 0                           | -1                 |
| <b>I-70</b>  | 0.2304                       | 0.1321             | -1                          | -1                 |
| <b>I-2</b>   | -1.585                       | -1.5274            | 1                           | 1                  |
| <b>I-87</b>  | -0.0315                      | -0.1727            | 0                           | 0                  |
| <b>I-59</b>  | -0.2147                      | -0.0458            | 0                           | 0                  |
| <b>I-54</b>  | -0.7212                      | -0.5611            | 0                           | 0                  |
| <b>I-88</b>  | -0.3279                      | -0.2797            | 0                           | 0                  |
| <b>I-18</b>  | 0                            | -0.3835            | 0                           | 0                  |
| <b>I-67</b>  | 0.2553                       | -0.085             | -1                          | 0                  |

**Figure S1.** Workflow of the virtual screening procedure.

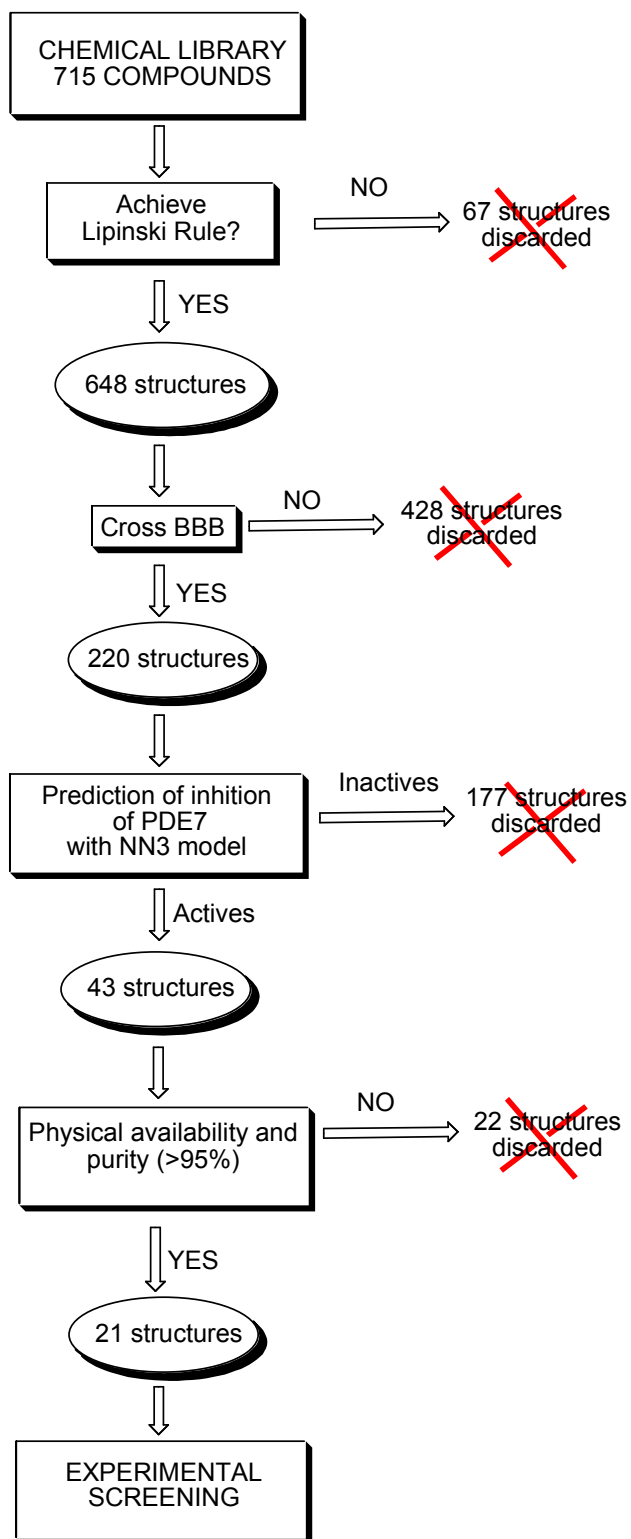

**Tabla S6.** SMILE code and physicochemical property filters for each molecule of the virtual screening

|    | <b>CODE</b> | <b>SMILE</b>                                   | <b>LogP</b> | <b>MW</b> | <b>nON</b> | <b>nOHNH</b> | <b>nviolations</b> | <b>nrotb</b> | <b>LogBB</b> |
|----|-------------|------------------------------------------------|-------------|-----------|------------|--------------|--------------------|--------------|--------------|
| 1  | AM003       | C1CCc2c(C1)c(c(s2)N)C#N                        | 2.06        | 178.26    | 2          | 2            | 0                  | 0            | 0.06         |
| 2  | AM019       | N1=C(C=C(N(CCc2ccccc2)S1(=O)=O)c1cccc1)c1cccc1 | 4.73        | 388.49    | 4          | 0            | 0                  | 5            | 0.73         |
| 3  | AM032       | n1cnc2c(c1SC(=O)Cc1cccc1)ncn2C(=O)Cc1cccc1     | 3.98        | 388.45    | 6          | 0            | 0                  | 6            | -0.02        |
| 4  | CG056       | c1(cc(c(c(c1)C(=O)OC)N)Cl)Cl                   | 2.98        | 220.06    | 3          | 2            | 0                  | 2            | -0.02        |
| 5  | AM047       | C1CCc2c(C1)c(nn2c1sc2c(n1)cccc2)C              | 4.04        | 269.37    | 3          | 0            | 0                  | 1            | 1.04         |
| 6  | AM048       | C1CCC2=C(C1)[C@H](N(N2)c1sc2c(n1)cccc2)C       | 4.53        | 271.39    | 3          | 1            | 0                  | 1            | 1.53         |
| 7  | AM048       | C1CCC2=C(C1)[C@@H](N(N2)c1sc2c(n1)cccc2)C      | 4.53        | 271.39    | 3          | 1            | 0                  | 1            | 1.53         |
| 8  | AM049       | [C@H]1(C=CN1c1sc2c(n1)cccc2)C                  | 2.73        | 217.30    | 3          | 1            | 0                  | 1            | -0.27        |
| 9  | AM052       | N1=NC2=C([C@H]1C)CCC2                          | 1.61        | 122.17    | 2          | 0            | 0                  | 0            | -0.39        |
| 10 | AM053       | C1(=NN=C(C1O)c1cccc1)c1cccc1                   | 2.57        | 236.27    | 3          | 1            | 0                  | 2            | -0.43        |
| 11 | AM054       | N1=NC2=C([C@H]1C)CCC2                          | 1.61        | 122.17    | 2          | 0            | 0                  | 0            | -0.39        |
| 12 | AM054       | N1=NC2=C([C@@H]1C)CCC2                         | 1.61        | 122.17    | 2          | 0            | 0                  | 0            | -0.39        |
| 13 | AM056       | N1=NC2=C([C@H]1C)CCC2                          | 1.61        | 122.17    | 2          | 0            | 0                  | 0            | -0.39        |
| 14 | AM056       | N1=NC2=C([C@@H]1C)CCC2                         | 1.61        | 122.17    | 2          | 0            | 0                  | 0            | -0.39        |
| 15 | AM057       | N1=NC2=C([C@H]1C)CCC2                          | 1.61        | 122.17    | 2          | 0            | 0                  | 0            | -0.39        |
| 16 | AM080       | c1ccc(c(c1)O)/C=N/c1cccc1                      | 3.41        | 197.24    | 2          | 1            | 0                  | 2            | 1.41         |
| 17 | AC004       | c1cnc(cc1)NC(=S)NCc1cccc1                      | 2.49        | 243.34    | 3          | 2            | 0                  | 5            | -0.52        |
| 18 | AC010       | c1ccc(cc1)NC(=S)NCC                            | 1.73        | 180.28    | 2          | 2            | 0                  | 4            | -0.28        |
| 19 | AC012       | c1ccc2c(c1)o/c(=N)CC[nH]2                      | 2.26        | 162.19    | 3          | 1            | 0                  | 1            | 0.26         |
| 20 | AC014       | c1cnc(cc1)/N=c1\sc(n1C)C                       | 2.86        | 205.29    | 3          | 0            | 0                  | 1            | -0.14        |
| 21 | AC016       | c1cnc(cc1)/N=c1n(c(ns1)c1cccc1)C               | 4.22        | 268.35    | 4          | 0            | 0                  | 2            | 0.22         |
| 22 | AC023       | c1ccc2c(c1)sc(n2)NCC                           | 2.73        | 178.26    | 2          | 1            | 0                  | 2            | 0.73         |
| 23 | AC027       | c1(ccc(cn1)Cl)NC(=O)NCc1cccc1                  | 2.79        | 225.42    | 4          | 2            | 0                  | 3            | -0.21        |

|    | CODE  | SMILE                                                                  | LogP | MW     | nON | nOHNH | nviolations | nrotb | LogBB |
|----|-------|------------------------------------------------------------------------|------|--------|-----|-------|-------------|-------|-------|
| 24 | CG106 | <chem>C1CCc2c(C1)c(c(s2)N)C(=O)OCC</chem>                              | 2.52 | 225.31 | 3   | 2     | 0           | 3     | -0.48 |
| 25 | CG108 | <chem>c1ccc2c(c1)c(c(s2)C(=O)OC)N</chem>                               | 2.39 | 207.25 | 3   | 2     | 0           | 2     | -0.61 |
| 26 | AC033 | <chem>c1cnc2c(c1)[nH]/c(=N\CC)s2</chem>                                | 2.76 | 179.25 | 3   | 1     | 0           | 1     | -0.24 |
| 27 | AC044 | <chem>c1nc(ccc1)NC(=S)SC</chem>                                        | 1.83 | 184.29 | 2   | 1     | 0           | 3     | -0.17 |
| 28 | AC052 | <chem>c1ccc2c(c1)N[C@@H](S2)[NH3]</chem>                               | 1.54 | 153.23 | 2   | 4     | 0           | 0     | -0.46 |
| 29 | AC061 | <chem>c1ccc2c(c1)sc(n2)N</chem>                                        | 1.98 | 150.21 | 2   | 2     | 0           | 0     | -0.02 |
| 30 | AC068 | <chem>C1CC(CCC1)/N=c1/n(c(=O)n(s1)C(C)C)CC</chem>                      | 4.04 | 269.41 | 4   | 0     | 0           | 3     | 0.04  |
| 31 | AC092 | <chem>c1cnc(cc1)/N=c1/n(c(ns1)c1cccc1)CC</chem>                        | 4.60 | 282.37 |     |       |             |       | 0.60  |
| 32 | AC093 | <chem>c1cnc(cc1)/N=c1/n(c(ns1)CC)Cc1cccc1</chem>                       | 4.36 | 296.40 | 4   | 0     | 0           | 4     | 0.36  |
| 33 | AC098 | <chem>c1ccc(nc1)/N=c1/n(c(=O)n(s1)C1CCCC1)CC</chem>                    | 4.10 | 304.42 | 5   | 0     | 0           | 3     | 0.10  |
| 34 | AC105 | <chem>c1ccc(cc1)/N=c1/n(c(=O)n(s1)C(C)C)CC</chem>                      | 3.83 | 263.37 | 4   | 0     | 0           | 3     | -0.17 |
| 35 | CG008 | <chem>N1=C(c2c(N(Cc3cccc3)S1(=O)=O)cccc2)OCc1ccc(cc1)Cl</chem>         | 4.75 | 412.90 | 5   | 0     | 0           | 5     | -0.25 |
| 36 | CG013 | <chem>c12c(cccc1)N(Cc1ccc(cc1)Cl)S(=O)(=O)N(C2=O)Cc1ccc(cc1)Cl</chem>  | 4.79 | 447.34 | 5   | 0     | 0           | 4     | -0.21 |
| 37 | CG015 | <chem>c12c(cccc1)N(Cc1cccc1Cl)S(=O)(=O)N(C2=O)Cc1c(cccc1)Cl</chem>     | 4.70 | 447.34 | 5   | 0     | 0           | 4     | -0.30 |
| 38 | CG019 | <chem>N1(C(=O)c2c(N(Cc3cccc3Cl)S1(=O)=O)cccc2)Cc1cccc1</chem>          | 4.07 | 412.90 | 5   | 0     | 0           | 4     | 0.07  |
| 39 | CG026 | <chem>N1(C(=O)c2c(N(Cc3ccc(cc3)Cl)S1(=O)=O)cccc2)Cc1cc(ccc1)Cl</chem>  | 4.75 | 447.34 | 5   | 0     | 0           | 4     | 0.75  |
| 40 | CG035 | <chem>N1(C(=O)c2c(N(Cc3ccc(cc3)OC)S1(=O)=O)cccc2)Cc1ccc(cc1)OC</chem>  | 3.55 | 438.51 | 7   | 0     | 0           | 6     | -0.45 |
| 41 | CG036 | <chem>N1(C(=O)c2c(N(Cc3ccc(cc3)C(F)(F)F)S1(=O)=O)cccc2)Cc1cccc1</chem> | 4.33 | 446.45 | 5   | 0     | 0           | 5     | 0.33  |
| 42 | CG059 | <chem>N1(C(=O)c2c(N(Cc3ccc(cc3)Cl)Cl)S1(=O)=O)ccs2)Cc1cccc1</chem>     | 4.60 | 453.37 | 5   | 0     | 0           | 4     | -0.40 |
| 43 | CG060 | <chem>n1(c(=S)n(c2c(c1=O)cccc2)Cc1ccc(cc1)Cl)Cc1cccc1</chem>           | 4.97 | 392.91 | 3   | 0     | 0           | 4     | 1.97  |
| 44 | CG062 | <chem>n1(c(=S)n(c2c(c1=O)cccc2)Cc1ccc(cc1)C(F)(F)F)Cc1cccc1</chem>     | 5.19 | 426.46 | 3   | 0     | 1           | 5     | 2.19  |
| 45 | CG067 | <chem>N1(C(=O)c2c(N(Cc3cccc4c3cccc4)S1(=O)=O)cccc2)Cc1cccc1</chem>     | 4.60 | 428.51 | 5   | 0     | 0           | 4     | -0.40 |
| 46 | CG069 | <chem>n1(c(=O)n(c2c(c1=O)cccc2)Cc1ccc(cc1)Cl)Cc1cccc1</chem>           | 4.63 | 376.84 | 4   | 0     | 0           | 4     | 0.63  |
| 47 | CG072 | <chem>n1(c(=S)[nH]c2c(c1=O)cccc2)Cc1cccc1</chem>                       | 2.63 | 268.34 | 3   | 1     | 0           | 2     | -0.37 |
| 48 | CG073 | <chem>N1(C(=O)c2c(N(Cc3ccc(c(c3)Cl)Cl)S1(=O)=O)cccc2)CC(C)C</chem>     | 4.45 | 413.33 | 5   | 0     | 0           | 4     | -0.55 |
| 49 | CG074 | <chem>N1=C(c2c(N(Cc3ccc(c(c3)Cl)Cl)S1(=O)=O)cccc2)OCC(C)C</chem>       | 4.89 | 413.33 | 5   | 0     | 0           | 5     | -0.12 |

|    | CODE   | SMILE                                                                 | LogP | MW     | nON | nOHNH | nviolations | nrotb | LogBB |
|----|--------|-----------------------------------------------------------------------|------|--------|-----|-------|-------------|-------|-------|
| 50 | CG086  | <chem>N1(C(=O)c2c(N(CC(=O)c3ccc(cc3)Cl)S1(=O)=O)cccc2)Cc1cccc1</chem> | 3.87 | 440.91 | 6   | 0     | 0           | 5     | -0.14 |
| 51 | CG088  | <chem>N1=C(c2c(N(Cc3ccc(cc3)Cl)S1(=O)=O)cccc2)OCC</chem>              | 3.53 | 350.83 | 5   | 0     | 0           | 4     | -0.47 |
| 52 | CG090  | <chem>N1=C(c2c(N(Cc3ccc(c(c3)Cl)Cl)S1(=O)=O)cccc2)OCC</chem>          | 4.14 | 385.27 | 5   | 0     | 0           | 4     | 0.14  |
| 53 | CG093  | <chem>N1(C(=O)c2c(N(Cc3ccc(cc3)Cl)S1(=O)=O)cccc2)CCC</chem>           | 3.60 | 364.85 | 5   | 0     | 0           | 4     | -0.40 |
| 54 | CG099  | <chem>c1(ccc(cc1)CCOCCI)OC</chem>                                     | 2.75 | 200.67 | 2   | 0     | 0           | 5     | 0.75  |
| 55 | CG101  | <chem>c1ccc(cc1)CCOCCI</chem>                                         | 2.69 | 170.64 | 1   | 0     | 0           | 4     | 1.69  |
| 56 | AE009  | <chem>c1(sc(cc1C(=O)OCC)c1cccc1)N</chem>                              | 3.26 | 247.32 | 3   | 2     | 0           | 4     | 0.26  |
| 57 | AE010  | <chem>C1CCc2c(C1)cn[nH]2</chem>                                       | 2.00 | 136.20 | 2   | 1     | 0           | 0     | 0.00  |
| 58 | AE084  | <chem>c1(sc(c(c1)N)C(=O)OC)c1cccc1</chem>                             | 3.00 | 233.29 | 3   | 2     | 0           | 3     | 0.00  |
| 59 | EF016  | <chem>c1ccc(cc1)NC(=S)NC1CC[NH](CC1)Cc1cccc1</chem>                   | 3.01 | 326.49 | 3   | 3     | 0           | 6     | 0.00  |
| 60 | EF017  | <chem>C1C(CC[NH](C1)Cc1cccc1)CCNC(=S)Nc1cccc1</chem>                  | 3.84 | 354.54 | 3   | 3     | 0           | 8     | 0.84  |
| 61 | EF019  | <chem>c1ccc2c(c1)sc(n2)NC1CC[NH](CC1)Cc1cccc1</chem>                  | 4.01 | 324.47 | 3   | 2     | 0           | 4     | 1.01  |
| 62 | AM094  | <chem>C1CCC2=C(C1)C(=NON2)C</chem>                                    | 2.13 | 152.20 | 3   | 1     | 0           | 0     | -0.88 |
| 63 | AM096  | <chem>c1(c(cc2c(c1)ncn2C)C)C</chem>                                   | 2.30 | 160.22 | 2   | 0     | 0           | 0     | 0.30  |
| 64 | AM0101 | <chem>c1(c(c(c(o1)c1cccc1)c1cccc1)C#N)N</chem>                        | 3.89 | 260.30 | 3   | 2     | 0           | 2     | 1.89  |
| 65 | AM106  | <chem>N1=C(C=C(NO1)c1cccc1)c1cccc1</chem>                             | 4.07 | 236.27 | 3   | 1     | 0           | 2     | 1.07  |
| 66 | TC2.30 | <chem>c1(ccc2c(c1)c(=O)n(c(=S)[nH]2)c1cccc1)Br</chem>                 | 3.10 | 333.21 | 3   | 1     | 0           | 1     | 0.10  |
| 67 | TC2.41 | <chem>c1ccc2c(c1)c(=O)n(c(n2)SC)c1c(c(c(cc1)F)F)F</chem>              | 3.80 | 322.31 | 3   | 0     | 0           | 2     | 0.80  |
| 68 | TC2.42 | <chem>c1c2c(sc1)c(=O)n(c(n2)SC)c1cccc1</chem>                         | 3.00 | 274.37 | 3   | 0     | 0           | 2     | 0.00  |
| 69 | TC2.43 | <chem>c1ccc2c(c1)c(=O)n(c(n2)SC)c1c(cccc1F)F</chem>                   | 3.90 | 304.32 | 3   | 0     | 0           | 2     | 0.90  |
| 70 | TC2.44 | <chem>c1ccc2c(c1)sc1c2nc(n(c1=O)c1c(cccc1F)F)SC</chem>                | 4.97 | 360.41 | 3   | 0     | 0           | 2     | 1.97  |
| 71 | TC2.45 | <chem>c1ccc2c(c1)c(=S)n(c(=S)[nH]2)c1c(c(c(cc1)F)F)F</chem>           | 3.21 | 324.35 | 2   | 1     | 0           | 1     | 1.21  |
| 72 | TC2.47 | <chem>c1cc2c(s1)c(=O)n(c(n2)SC)c1c(cccc1F)F</chem>                    | 3.66 | 310.35 | 3   | 0     | 0           | 2     | 0.66  |
| 73 | TC2.51 | <chem>c1ccc2c(c1)c(=S)n(c(n2)SC)c1c(c(c(cc1)F)F)F</chem>              | 4.15 | 338.38 | 2   | 0     | 0           | 2     | 2.15  |
| 74 | TC3.1  | <chem>c1ccc2c(c1)c(=S)n(c(n2)SC)c1c(cccc1F)F</chem>                   | 4.24 | 320.39 | 2   | 0     | 0           | 2     | 2.24  |
| 75 | TC3.9  | <chem>c1ccc2c(c1)c(=S)n(c(n2)SC)c1cccc1</chem>                        | 3.59 | 284.41 | 2   | 0     | 0           | 2     | 1.59  |
| 76 | TC3.13 | <chem>c1ccc2c(c1)c(=S)n(c(n2)SC)c1c(cccc1)Br</chem>                   | 4.56 | 363.31 | 2   | 0     | 0           | 2     | 2.56  |

|     | CODE   | SMILE                                                           | LogP | MW     | nON | nOHNH | nviolations | nrotb | LogBB |
|-----|--------|-----------------------------------------------------------------|------|--------|-----|-------|-------------|-------|-------|
| 77  | TC3.14 | <chem>c1cc(c2c(c1)c(=O)n(c(=S)[nH]2)c1c(cccc1)Br)C</chem>       | 3.69 | 347.24 | 3   | 1     | 0           | 1     | 0.69  |
| 78  | TC3.16 | <chem>c1cc(c2c(c1)c(=O)n(c(=S)[nH]2)c1c(cccc1F)F)C</chem>       | 3.37 | 304.32 | 3   | 1     | 0           | 1     | 0.37  |
| 79  | TC3.17 | <chem>c1cc(c2c(c1)c(=O)n(c(=S)[nH]2)c1c(c(c(cc1)F)F)F)C</chem>  | 3.27 | 322.31 | 3   | 1     | 0           | 1     | 0.27  |
| 80  | TC3.22 | <chem>c1cc(c2c(c1)c(=O)n(c(n2)SC)c1c(cccc1)Br)C</chem>          | 4.62 | 361.26 | 3   | 0     | 0           | 2     | 1.62  |
| 81  | TC3.23 | <chem>c1cc(c2c(c1)c(=O)n(c(n2)SC)c1c(cccc1F)F)C</chem>          | 4.30 | 318.35 | 3   | 0     | 0           | 2     | 1.30  |
| 82  | TC3.24 | <chem>c1cc(c2c(c1)c(=O)n(c(n2)SC)c1c(c(c(cc1)F)F)F)C</chem>     | 4.20 | 336.34 | 3   | 0     | 0           | 2     | 1.20  |
| 83  | TC3.28 | <chem>c1(ccc2c(c1)c(=O)n(c(=S)[nH]2)c1c(cccc1)Br)Br</chem>      | 4.07 | 412.11 | 3   | 1     | 0           | 1     | 1.07  |
| 84  | TC3.29 | <chem>c1(ccc2c(c1)c(=O)n(c(=S)[nH]2)c1c(cccc1F)F)Br</chem>      | 3.75 | 369.19 | 3   | 1     | 0           | 1     | 0.75  |
| 85  | TC3.30 | <chem>c1(ccc2c(c1)c(=O)n(c(=S)[nH]2)c1c(c(c(cc1)F)F)F)Br</chem> | 3.66 | 387.18 | 3   | 1     | 0           | 1     | 0.66  |
| 86  | TC3.32 | <chem>c1(ccc2c(c1)c(=O)n(c(n2)SC)c1c(c(c(cc1)F)F)F)Br</chem>    | 4.59 | 401.21 | 3   | 0     | 0           | 2     | 1.59  |
| 87  | TC3.36 | <chem>c1(ccc2c(c1)c(=O)n(c(n2)SC)c1c(cccc1F)F)Br</chem>         | 4.68 | 383.22 | 3   | 0     | 0           | 2     | 1.68  |
| 88  | TC3.47 | <chem>c1(ccc2c(c1)c(=O)n(c(n2)SC)c1ccccc1)Br</chem>             | 4.03 | 347.24 | 3   | 0     | 0           | 2     | 1.03  |
| 89  | S016   | <chem>c1ccc2c(c1)c(=O)n(c(=S)[nH]2)c1ccc(cc1)C(F)F)F</chem>     | 3.21 | 322.31 | 3   | 1     | 0           | 2     | 0.21  |
| 90  | S015   | <chem>c1ccc2c(c1)c(=O)n(c(=S)[nH]2)c1ccc(cc1)C</chem>           | 2.76 | 268.34 | 3   | 1     | 0           | 1     | -0.24 |
| 91  | S022   | <chem>c1ccc2c(c1)c(=O)n(c(=S)[nH]2)c1ccc(cc1)Cl</chem>          | 2.99 | 288.76 | 3   | 1     | 0           | 1     | -0.01 |
| 92  | S023   | <chem>c1ccc2c(c1)c(=O)n(c(=S)[nH]2)c1ccc(cc1)F</chem>           | 2.48 | 272.30 | 3   | 1     | 0           | 1     | -0.52 |
| 93  | S025   | <chem>c1ccc2c(c1)c(=O)n(c(=S)[nH]2)c1cc(c(c1)F)F)F</chem>       | 3.08 | 308.28 | 3   | 1     | 0           | 1     | 0.08  |
| 94  | S026   | <chem>c1ccc2c(c1)c(=O)n(c(=S)[nH]2)c1ccc(cc1)Br</chem>          | 3.12 | 333.21 | 3   | 1     | 0           | 1     | 0.12  |
| 95  | S027   | <chem>c1ccc2c(c1)c(=O)n(c(=S)[nH]2)c1cc(ccc1)Br</chem>          | 3.31 | 333.21 | 3   | 1     | 0           | 1     | 0.31  |
| 96  | S028   | <chem>c1ccc2c(c1)c(=O)n(c(=S)[nH]2)c1c(cccc1)Br</chem>          | 3.29 | 333.21 | 3   | 1     | 0           | 1     | 0.29  |
| 97  | S029   | <chem>c1ccc2c(c1)c(=O)n(c(=S)[nH]2)c1c(cc(cc1)Br)F</chem>       | 3.43 | 351.20 | 3   | 1     | 0           | 1     | 0.43  |
| 98  | S033   | <chem>c1ccc2c(c1)c(=O)n(c(=S)[nH]2)c1cccc2c1cccc2</chem>        | 3.68 | 304.37 | 3   | 1     | 0           | 1     | 0.68  |
| 99  | S035   | <chem>c1ccc2c(c1)c(=O)n(c(=S)[nH]2)CCc1ccccc1</chem>            | 2.84 | 282.37 | 3   | 1     | 0           | 3     | -0.16 |
| 100 | S037   | <chem>c1ccc2c(c1)c(=O)n(c(n2)SC)c1ccccc1</chem>                 | 3.25 | 268.34 | 3   | 0     | 0           | 2     | 0.25  |
| 101 | S038   | <chem>c1ccc2c(c1)c(=O)n(c(n2)SC)c1c(cccc1)Br</chem>             | 4.22 | 347.24 | 3   | 0     | 0           | 2     | 2.22  |
| 102 | S041   | <chem>c1cc2c(s1)c(=O)n(c(=S)[nH]2)c1c(cc(cc1)Br)F</chem>        | 3.19 | 357.23 | 3   | 1     | 0           | 1     | 0.19  |
| 103 | S043   | <chem>c1cc2c(s1)c(=O)n(c(=S)[nH]2)c1c(c(c(cc1)F)F)F</chem>      | 2.63 | 314.31 | 3   | 1     | 0           | 1     | -0.37 |



|     | CODE         | SMILE                                                            | LogP | MW     | nON | nOHNH | nviolations | nrotb | LogBB |
|-----|--------------|------------------------------------------------------------------|------|--------|-----|-------|-------------|-------|-------|
| 104 | S045         | <chem>c12c(c3c(s1)c(=O)n(c(=S)[nH]3)c1cccc1)cccc2</chem>         | 3.38 | 310.40 | 3   | 1     | 0           | 1     | 0.38  |
| 105 | S047         | <chem>c12c(c3c(s1)c(=O)n(c(=S)[nH]3)c1c(cc(cc1)Br)F)cccc2</chem> | 4.49 | 407.29 | 3   | 1     | 0           | 1     | 1.49  |
| 106 | S048         | <chem>c12c(c3c(s1)c(=O)n(c(=S)[nH]3)c1c(cccc1F)F)cccc2</chem>    | 4.03 | 346.38 | 3   | 1     | 0           | 1     | 1.03  |
| 107 | S049         | <chem>c12c(c3c(s1)c(=O)n(c(=S)[nH]3)c1c(c(cc1)F)F)cccc2</chem>   | 3.94 | 364.37 | 3   | 1     | 0           | 1     | 0.94  |
| 108 | <b>VP0.1</b> | <chem>C1[C@H](Cc2c(C1)c(c(s2)NC(=O)CCCC)C(=O)OCCC)C</chem>       | 4.34 | 357.90 | 4   | 1     | 0           | 8     | 0.34  |
| 109 | SC003        | <chem>C1CCc2c(C1)c(cs2)OC[C@H](CNC(C)C)O</chem>                  | 2.57 | 269.41 | 3   | 2     | 0           | 6     | -0.43 |
| 110 | SC004a       | <chem>c1(c(c(cs1)Cl)Cl)[C@@H]([C@@H](C)N)Cl</chem>               | 2.82 | 244.57 | 1   | 2     | 0           | 2     | 1.82  |
| 111 | SC004b       | <chem>c1(c(c(cs1)Cl)Cl)[C@H]([C@H](C)N)Cl</chem>                 | 2.82 | 244.57 | 1   | 2     | 0           | 2     | 1.82  |
| 112 | SC004c       | <chem>c1(c(c(cs1)Cl)Cl)[C@H]([C@@H](C)N)Cl</chem>                | 2.82 | 244.57 | 1   | 2     | 0           | 2     | 1.82  |
| 113 | SC004d       | <chem>c1(c(c(cs1)Cl)Cl)[C@H]([C@H](C)N)Cl</chem>                 | 2.82 | 244.57 | 1   | 2     | 0           | 2     | 1.82  |
| 114 | SC005        | <chem>c1(nn(c(n1)CCCl)c1cccc1)c1cccc1</chem>                     | 3.74 | 283.76 | 3   | 0     | 0           | 4     | 0.74  |
| 115 | SC006        | <chem>c1(ccc2c(c1)c1c(n2NC(=O)c2cccc2)cccc1)Cl</chem>            | 4.98 | 320.78 | 3   | 1     | 0           | 2     | 1.98  |
| 116 | SC007a       | <chem>c1c(sc(c1Cl)[C@@H]([C@H](C)CN)Cl)Cl</chem>                 | 3.36 | 258.60 | 1   | 2     | 0           | 3     | 1.36  |
| 117 | SC007b       | <chem>c1c(sc(c1Cl)[C@@H]([C@@H](C)CN)Cl)Cl</chem>                | 3.36 | 258.60 | 1   | 2     | 0           | 3     | 2.36  |
| 118 | SC007c       | <chem>c1c(sc(c1Cl)[C@H]([C@H](C)CN)Cl)Cl</chem>                  | 3.36 | 258.60 | 1   | 2     | 0           | 3     | 2.36  |
| 119 | SC007d       | <chem>c1c(sc(c1Cl)[C@H]([C@@H](C)CN)Cl)Cl</chem>                 | 3.36 | 258.60 | 1   | 2     | 0           | 3     | 2.36  |
| 120 | SC008        | <chem>c1cccc(c1)N(C(=O)C)NC(=O)c1cccc1</chem>                    | 2.19 | 254.29 | 4   | 1     | 0           | 3     | -0.81 |
| 121 | SC009        | <chem>c1cccc(c1)N(NC(=O)c1cccc1)C</chem>                         | 2.83 | 226.28 | 3   | 1     | 0           | 3     | -0.17 |
| 122 | SC013        | <chem>c1ccc2c(c1)n([nH]c(nc2=O)c1cccc1)c1cccc1</chem>            | 4.24 | 313.36 | 4   | 1     | 0           | 2     | 0.24  |
| 123 | SC013        | <chem>c1ccc2c(c1)n(nc([nH]c2=O)c1cccc1)c1cccc1</chem>            | 4.24 | 313.36 | 4   | 1     | 0           | 2     | 0.24  |
| 124 | SC015a       | <chem>c1(c(ccs1)Br)[C@@H](CNC(C)(C)C)O</chem>                    | 2.73 | 278.22 | 2   | 2     | 0           | 4     | 0.73  |
| 125 | SC015b       | <chem>c1(c(ccs1)Br)[C@H](CNC(C)(C)C)O</chem>                     | 2.73 | 278.22 | 2   | 2     | 0           | 4     | 0.73  |
| 126 | SC016        | <chem>c12c(ccc(c1)Cl)Sc1c(N2CCNN2CCN(CC2)C)cccc1</chem>          | 4.41 | 374.94 | 4   | 1     | 0           | 4     | 0.41  |
| 127 | SC018        | <chem>c1ccc2c(c1)c1c(n2N=O)cccc1</chem>                          | 3.33 | 196.21 | 3   | 0     | 0           | 1     | 0.33  |
| 128 | SC019        | <chem>c1ccc2c(c1)c1c(n2N)c(ccc1)Cl</chem>                        | 3.55 | 216.67 | 2   | 2     | 0           | 0     | 1.55  |
| 129 | SC109a       | <chem>Cl[C@@H]1CCCN1CC(=O)O</chem>                               | 3.55 | 216.67 | 2   | 2     | 0           | 0     | 0.55  |
| 130 | SC109b       | <chem>Cl[C@H]1CCCN1CC(=O)O</chem>                                | 3.55 | 216.67 | 2   | 2     | 0           | 0     | 0.55  |

|     | CODE          | SMILE                                                           | LogP | MW     | nON | nOHNH | nviolations | nrotb | LogBB |
|-----|---------------|-----------------------------------------------------------------|------|--------|-----|-------|-------------|-------|-------|
| 131 | SC023         | <chem>n1(c(nc(n1)c1cccc1)SC)c1cccc1</chem>                      | 3.77 | 267.36 | 3   | 0     | 0           | 3     | 0.77  |
| 132 | SC024         | <chem>c1(NNC(=O)c2cccc2)cccc1</chem>                            | 2.59 | 212.25 | 3   | 2     | 0           | 3     | -0.41 |
| 133 | SC025         | <chem>c1(N(NC(=O)c2cccc2)c2cccc2)cccc1</chem>                   | 4.53 | 288.35 | 3   | 1     | 0           | 4     | 1.53  |
| 134 | SC027a        | <chem>c1csc(c1Cl)C[C@@H](Cl)CN</chem>                           | 2.40 | 224.16 | 1   | 2     | 0           | 4     | 1.40  |
| 135 | SC027b        | <chem>c1csc(c1Cl)C[C@H](Cl)CN</chem>                            | 2.40 | 224.16 | 1   | 2     | 0           | 4     | 1.40  |
| 136 | SC030         | <chem>c12c(cccc1)Sc1c(N2CCNN2CCN(CC2)C)cccc1</chem>             | 3.76 | 340.50 | 4   | 1     | 0           | 4     | -0.24 |
| 137 | SC031         | <chem>c12c(cccc1)Sc1c(N2CCNN(C)C)cccc1</chem>                   | 3.87 | 285.42 | 3   | 1     | 0           | 4     | 0.87  |
| 138 | SC034         | <chem>c12c(N(c3c(S1)cccc3)NC(=O)CN1CCCC1)ccc(c2)Cl</chem>       | 4.75 | 373.91 | 4   | 1     | 0           | 3     | 0.75  |
| 139 | SC035         | <chem>c12c(N(c3c(S1)cccc3)NC(=O)CN1CCCC1)cc(cc2)Cl</chem>       | 4.25 | 359.88 | 4   | 1     | 0           | 3     | 0.25  |
| 140 | SC036         | <chem>c12c(N(c3c(S1)cccc3)NC(=O)CCN(C)C)ccc(c2)Cl</chem>        | 4.11 | 347.87 | 4   | 1     | 0           | 4     | 0.11  |
| 141 | SC037         | <chem>c12c(N(c3c(S1)cccc3)NC(=O)CN(CC)CC)cc(cc2)Cl</chem>       | 4.60 | 361.90 | 4   | 1     | 0           | 5     | 0.60  |
| 142 | SC038         | <chem>c12c(N(c3c(S1)cccc3)NC(=O)C)cccc2</chem>                  | 3.20 | 256.33 | 3   | 1     | 0           | 1     | 0.20  |
| 143 | SC039         | <chem>c12c(N(c3c(S1)cccc3)NC(=O)CN1CCCC1)cccc2</chem>           | 3.59 | 325.44 | 4   | 1     | 0           | 3     | 0.59  |
| 144 | SC040         | <chem>c12c(N(c3c(S1)cccc3)NC(=O)C)cc(cc2)Cl</chem>              | 3.85 | 290.78 | 3   | 1     | 0           | 1     | 0.85  |
| 145 | SC041         | <chem>c12c(N(c3c(S1)cccc3)NC(=O)CN(C)C)cc(cc2)Cl</chem>         | 3.84 | 333.84 | 4   | 1     | 0           | 3     | -0.16 |
| 146 | SC042         | <chem>c12c(N(c3c(S1)cccc3)CC=O)cc(cc2)Cl</chem>                 | 4.55 | 275.76 | 2   | 0     | 0           | 2     | 2.55  |
| 147 | SC043         | <chem>c12c(N(c3c(S1)cccc3)NC(=O)CN1CCCC1)cc(cc2)Cl</chem>       | 4.75 | 373.91 | 4   | 1     | 0           | 3     | 0.75  |
| 148 | SC044         | <chem>c12c(N(c3c(S1)cccc3)NC(=O)CN1CCCC1)cccc2</chem>           | 4.10 | 339.46 | 4   | 1     | 0           | 3     | 0.10  |
| 149 | SC045         | <chem>c12c(N(c3c(S1)cccc3)NC(=O)CN(C)C)ccc(c2)Cl</chem>         | 3.84 | 333.84 | 4   | 1     | 0           | 3     | -0.16 |
| 150 | <b>VP1.16</b> | <chem>O=C(OCC)C/N=C1SN(C2=CC=CC=C2)C(C3=CC=CC=C3)=N\1.Br</chem> | 4.94 | 339.42 | 5   | 0     | 0           | 6     | -0.06 |
| 151 | SC046         | <chem>c12c(N(c3c(S1)cccc3)NC(=O)CN1CCCC1)ccc(c2)Cl</chem>       | 4.25 | 359.88 | 4   | 1     | 0           | 3     | 0.25  |
| 152 | SC047         | <chem>c12c(N(c3c(S1)cccc3)CCNN1CCCC1)cccc2</chem>               | 4.78 | 325.48 | 3   | 1     | 0           | 4     | 1.78  |
| 153 | SC048         | <chem>c12c(N(c3c(S1)cccc3)NC(=O)CN1CCCC1)c(ccc2)Cl</chem>       | 4.73 | 373.91 | 4   | 1     | 0           | 3     | 0.73  |
| 154 | SC049         | <chem>c12c(N(c3c(S1)cccc3)NC(=O)CN1CCCC1)cc(cc2)Cl</chem>       | 4.25 | 359.88 | 4   | 1     | 0           | 3     | 0.25  |
| 155 | SC050         | <chem>c12c(N(c3c(S1)cccc3)NC(=O)CN1CCCC1)c(ccc2)Cl</chem>       | 4.73 | 373.91 | 4   | 1     | 0           | 3     | 0.73  |
| 156 | SC051         | <chem>c12c(N(c3c(S1)cccc3)NC(=O)CN1CCCC1)ccc(c2)Cl</chem>       | 4.25 | 359.88 | 4   | 1     | 0           | 3     | 0.25  |
| 157 | SC052         | <chem>c12c(N(c3c(S1)cccc3)N)cccc2</chem>                        | 3.46 | 214.29 | 2   | 2     | 0           | 0     | 1.46  |

|     | CODE   | SMILE                                                      | LogP | MW     | nON | nOHNH | nviolations | nrotb | LogBB |
|-----|--------|------------------------------------------------------------|------|--------|-----|-------|-------------|-------|-------|
| 158 | SC054  | <chem>c12c(N(c3c(S1)cccc3)NC(=O)CN1CCCCC1)ccc(c2)Cl</chem> | 4.75 | 373.91 | 4   | 1     | 0           | 3     | 0.75  |
| 159 | SC055  | <chem>c12c(N(c3c(S1)cccc3)NC(=O)CN1CCCCC1)cc(cc2)Cl</chem> | 4.75 | 373.91 | 4   | 1     | 0           | 3     | 0.75  |
| 160 | SC056  | <chem>c12c(N(c3c(S1)cccc3)NC(=O)CN(C)C)ccc(c2)Cl</chem>    | 3.84 | 333.84 | 4   | 1     | 0           | 3     | -0.16 |
| 161 | SC057  | <chem>c12c(N(c3c(S1)cccc3)NC(=O)C)ccc(c2)Cl</chem>         | 3.85 | 290.78 | 3   | 1     | 0           | 1     | 0.85  |
| 162 | SC059  | <chem>S1c2c(N=Nc3c1cccc3)ccc(c2)Cl</chem>                  | 4.43 | 246.72 | 2   | 0     | 0           | 0     | 2.43  |
| 163 | SC070  | <chem>c1(ccc(c(c1)Sc1c(cccc1)[N](=O)O)N)Cl</chem>          | 3.90 | 280.74 | 4   | 2     | 0           | 3     | -0.10 |
| 164 | SC074  | <chem>c1cc(cc(c1)Sc1c(cccc1)NNC(=O)CN1CCCCC1)Cl</chem>     | 4.39 | 375.93 | 4   | 2     | 0           | 6     | 0.39  |
| 165 | SC083a | <chem>c1(c(cc(s1)Cl)C[C@H](N)C)Cl</chem>                   | 2.51 | 210.13 | 1   | 2     | 0           | 2     | 1.51  |
| 166 | SC083b | <chem>c1(c(cc(s1)Cl)C[C@@H](N)C)Cl</chem>                  | 2.51 | 210.13 | 1   | 2     | 0           | 2     | 1.51  |
| 167 | SC084  | <chem>c1(cc(c(s1)Br)Br)I</chem>                            | 4.47 | 367.83 | 0   | 0     | 0           | 0     | 4.47  |
| 168 | SC086  | <chem>c1(c(c(c(s1)Br)Br)Cl)Br</chem>                       | 4.81 | 355.28 | 0   | 0     | 0           | 0     | 4.81  |
| 169 | SC089a | <chem>c1(cccs1)C[C@@H](C)N</chem>                          | 1.22 | 141.24 | 1   | 2     | 0           | 2     | 0.22  |
| 170 | SC089b | <chem>c1(cccs1)C[C@H](C)N</chem>                           | 1.22 | 141.24 | 1   | 2     | 0           | 2     | 0.22  |
| 171 | SC090a | <chem>c1(c(cc(s1)Cl)Cl)C[C@@H](C)N</chem>                  | 2.63 | 210.13 | 1   | 2     | 0           | 2     | 1.63  |
| 172 | SC090b | <chem>c1(c(cc(s1)Cl)Cl)C[C@H](C)N</chem>                   | 2.63 | 210.13 | 1   | 2     | 0           | 2     | 1.63  |
| 173 | SC091a | <chem>c1(cc(cs1)Cl)C[C@@H](C)N</chem>                      | 1.83 | 175.68 | 1   | 2     | 0           | 2     | 0.83  |
| 174 | SC091b | <chem>c1(cc(cs1)Cl)C[C@H](C)N</chem>                       | 1.83 | 175.68 | 1   | 2     | 0           | 2     | 0.83  |
| 175 | SC093a | <chem>c1(c(ccs1)Cl)C[C@H](CC)N</chem>                      | 2.09 | 210.13 | 1   | 2     | 0           | 3     | 1.09  |
| 176 | SC093b | <chem>c1(c(ccs1)Cl)C[C@@H](CC)N</chem>                     | 2.09 | 210.13 | 1   | 2     | 0           | 3     | 1.09  |
| 177 | SC094a | <chem>c1(cc(c(s1)Cl)Cl)C[C@H](CC)N</chem>                  | 2.89 | 244.57 | 1   | 2     | 0           | 3     | 1.89  |
| 178 | SC094b | <chem>c1(cc(c(s1)Cl)Cl)C[C@@H](CC)N</chem>                 | 2.89 | 244.57 | 1   | 2     | 0           | 3     | 1.89  |
| 179 | SC096  | <chem>c1(c(c(cs1)Cl)Cl)C[C@H](CC)N</chem>                  | 2.70 | 244.57 | 1   | 2     | 0           | 3     | 1.70  |
| 180 | SC103  | <chem>c1(ccc(cc1)Cl)/C=C/[N](=O)O)C</chem>                 | 2.66 | 197.62 | 3   | 0     | 0           | 2     | -0.34 |
| 181 | SC113  | <chem>c1c(cc(c(c1)Sc1c(cccc1)[N](=O)O)N)Cl</chem>          | 3.90 | 280.74 | 4   | 2     | 0           | 3     | -0.10 |
| 182 | SC114  | <chem>c1ccc(c(c1)Sc1c(cccc1)[N](=O)O)Br</chem>             | 4.58 | 310.17 | 3   | 0     | 0           | 3     | 1.58  |
| 183 | SC115  | <chem>c1(c(c(c(s1)Cl)Cl)O)C(=O)OC</chem>                   | 2.79 | 227.07 | 3   | 1     | 0           | 2     | -0.22 |
| 184 | SC116  | <chem>c1cccc(c1)Nc1cccc1</chem>                            | 3.93 | 169.23 | 1   | 1     | 0           | 2     | 2.93  |

|     | CODE   | SMILE                                                      | LogP | MW     | nON | nOHNH | nviolations | nrotb | LogBB |
|-----|--------|------------------------------------------------------------|------|--------|-----|-------|-------------|-------|-------|
| 185 | SC118  | <chem>c1ccc(c(c1)Sc1c(cccc1)NNC(=O)C)Br</chem>             | 3.60 | 337.24 | 3   | 2     | 0           | 4     | 0.60  |
| 186 | SC119  | <chem>s1c2c([n]([n](c3c1cccc3)C(=O)C)C(=O)C)cccc2</chem>   | 4.45 | 298.37 | 4   | 0     | 0           | 0     | 0.45  |
| 187 | SC120  | <chem>c1c(sc(c1O)C(=O)OC)c1cccc1</chem>                    | 3.30 | 234.28 | 3   | 1     | 0           | 3     | 0.30  |
| 188 | CO1101 | <chem>c12c(cccc1)nc(n2Cc1sccc1)c1sccc1</chem>              | 4.89 | 296.42 | 8   | 5     | 0           | 0     | 2.89  |
| 189 | CO1102 | <chem>c12c(cccc1)[nH]c([nH]2)c1cccs1</chem>                | 3.34 | 201.27 | 9   | 4     | 0           | 2     | 1.34  |
| 190 | CO1103 | <chem>c12c(cccc1)nc([nH]2)c1ccc(s1)C</chem>                | 3.55 | 214.29 | 2   | 1     | 0           | 1     | 1.55  |
| 191 | CO1104 | <chem>c12c(cccc1)[nH]c(n2)c1cccc1</chem>                   | 3.55 | 194.24 | 7   | 4     | 0           | 0     | 1.55  |
| 192 | CO1105 | <chem>c12c(cccc1)[nH]c(n2)c1csc1</chem>                    | 3.31 | 200.27 | 7   | 4     | 0           | 1     | 1.31  |
| 193 | CO1106 | <chem>c12c(cccc1)nc(n2Cc1sccc1)c1csc1</chem>               | 4.38 | 296.42 | 7   | 4     | 0           | 1     | 2.38  |
| 194 | CO2103 | <chem>c12c(cccc1)nc(c(n2)c1sccc1)c1sccc1</chem>            | 4.65 | 294.40 | 2   | 0     | 0           | 2     | 2.65  |
| 195 | CO2106 | <chem>c12c(cccc1)nc(c(n2)c1occc1)c1occc1</chem>            | 3.36 | 262.27 | 4   | 0     | 0           | 2     | 1.36  |
| 196 | CO2107 | <chem>[C@H]12[C@@H](CCCC1)N=C(C(=N2)c1cccc1)c1cccc1</chem> | 4.62 | 288.39 | 2   | 0     | 0           | 2     | 2.62  |
| 197 | CO2109 | <chem>c12c(CCCC1)nc(c(n2)c1cccc1)c1cccc1</chem>            | 4.82 | 286.38 | 2   | 0     | 0           | 2     | 2.82  |
| 198 | CO2110 | <chem>[C@@H]12[C@H](CCCC1)N=C(C(=N2)c1cccc1)c1cccc1</chem> | 4.62 | 288.39 | 2   | 0     | 0           | 2     | 2.62  |
| 199 | CO2301 | <chem>n1c(c(nc2c1nccc2)c1cccc1)c1cccc1</chem>              | 4.18 | 283.33 | 3   | 0     | 0           | 2     | 1.18  |
| 200 | CO2302 | <chem>n1c(c(nc2c1cncc2)c1cccc1)c1cccc1</chem>              | 3.98 | 283.33 | 3   | 0     | 0           | 2     | 0.98  |
| 201 | CO4002 | <chem>c1(ccn([n]1C)Cl)C</chem>                             | 1.69 | 237.06 | 2   | 0     | 0           | 1     | 0.69  |
| 202 | SC122  | <chem>c12c(sc(c1O)C(=O)OCC)CCC2</chem>                     | 2.41 | 212.27 | 3   | 1     | 0           | 3     | -0.59 |
| 203 | SC126  | <chem>c1(csc(c1O)C(=O)OC)c1cccc1</chem>                    | 3.10 | 234.28 | 3   | 1     | 0           | 3     | 0.10  |
| 204 | SC132  | <chem>c1c(sc(c1O)C(=O)OCC)c1cccc1</chem>                   | 3.67 | 248.30 | 3   | 1     | 0           | 4     | 0.67  |
| 205 | SC130  | <chem>c1c(sc(c1O)C(=O)OC)c1cccc1</chem>                    | 3.30 | 234.28 | 3   | 1     | 0           | 3     | 0.30  |
| 206 | SC127  | <chem>c1(csc(c1O)C(=O)OC)c1cccc1</chem>                    | 3.10 | 234.28 | 3   | 1     | 0           | 3     | 0.10  |
| 207 | SC133  | <chem>c1(c(scc1OC[C@@H](CNC(C)(C)C)O)Cl)C</chem>           | 3.09 | 277.82 | 3   | 2     | 0           | 6     | 0.09  |
| 208 | SC134  | <chem>s1ccc2c1c(c(s2)C(=O)OC)OC[C@H]1CO1</chem>            | 2.55 | 270.33 | 4   | 0     | 0           | 5     | -0.45 |
| 209 | SC138  | <chem>c1(cc(sc1C(=O)OC)c1cccc1)O</chem>                    | 3.30 | 234.28 | 3   | 1     | 0           | 3     | 0.30  |
| 210 | SC139  | <chem>c1(csc(c1O)C(=O)OC)Sc1cccc1</chem>                   | 3.27 | 266.34 | 3   | 1     | 0           | 4     | 0.27  |
| 211 | SC140  | <chem>c1csc2c1sc(c2O)C(=O)OC</chem>                        | 2.44 | 214.27 | 3   | 1     | 0           | 2     | -0.56 |

|     | <b>CODE</b> | <b>SMILE</b>                                     | <b>LogP</b> | <b>MW</b> | <b>nON</b> | <b>nOHNH</b> | <b>nviolations</b> | <b>nrotb</b> | <b>LogBB</b> |
|-----|-------------|--------------------------------------------------|-------------|-----------|------------|--------------|--------------------|--------------|--------------|
| 212 | SC141       | <chem>c1(c(sc(c1O)C(=O)CC)Sc1ccccc1)C</chem>     | 4.58        | 278.40    | 2          | 1            | 0                  | 4            | 2.58         |
| 213 | SC142       | <chem>c1(c(sc(c1O)C(=O)OC)Cl)Cl</chem>           | 2.79        | 227.07    | 3          | 1            | 0                  | 2            | -0.22        |
| 214 | SC143       | <chem>c1(c(sc(c1O)C(=O)OC)Cl)c1ccccc1</chem>     | 3.90        | 268.72    | 3          | 1            | 0                  | 3            | 0.90         |
| 215 | SC145       | <chem>c1(c(sc(c1OC)C(=O)OC)OC)c1ccccc1</chem>    | 3.56        | 278.33    | 4          | 0            | 0                  | 5            | -0.44        |
| 216 | SC154       | <chem>c1(c(sc(c1OC)C(=O)OC)C)Cl</chem>           | 2.48        | 220.68    | 3          | 0            | 0                  | 3            | -0.52        |
| 217 | SC155       | <chem>c1(c(scc1OC[C@@H](CNC(C)(C)C)O)Cl)C</chem> | 3.09        | 277.82    | 3          | 2            | 0                  | 6            | 0.09         |
| 218 | SC156       | <chem>s1cc(OC[C@@H](CNC(C)(C)C)O)c2c1ccs2</chem> | 2.98        | 285.43    | 3          | 2            | 0                  | 6            | -0.02        |
| 219 | SC159       | <chem>c1(c(sc(c1O)C(=O)OC)Cl)C</chem>            | 2.56        | 206.65    | 3          | 1            | 0                  | 2            | -0.44        |
| 220 | SV047       | <chem>C1CN=C(NC1)SCI</chem>                      | 1.66        | 256.11    | 2          | 1            | 0                  | 2            | -0.34        |

**Tabla S7.** Hidden neurons (input parameter) and activity prediction for each molecule of the virtual screening

|    | CODES INPUT |          |          |          |          | OUTPUT   |
|----|-------------|----------|----------|----------|----------|----------|
|    | CODE        | P1       | P2       | P3       | P4       | NNE3A    |
| 1  | AM003       | 0.646981 | 0.50407  | 0.993123 | 0.433044 | Moderate |
| 2  | AM019       | 0.075575 | 0.030073 | 0.056933 | 0.579541 | Moderate |
| 3  | AM032       | 0.039968 | 0.02834  | 0.080709 | 0.646056 | Moderate |
| 4  | CG056       | 0.360127 | 0.761412 | 0.786028 | 0.277918 | Inactive |
| 5  | AM047       | 0.954122 | 0.231238 | 0.096872 | 0.722267 | Active   |
| 6  | AM048       | 0.069716 | 0.449017 | 0.477391 | 0.889873 | Moderate |
| 7  | AM048       | 0.069716 | 0.449017 | 0.477391 | 0.889873 | Moderate |
| 8  | AM049       | 0.992739 | 0.901818 | 0.968266 | 0.187912 | Inactive |
| 9  | AM052       | 0.973953 | 0.951481 | 0.840147 | 0.990882 | Inactive |
| 10 | AM053       | 0.181515 | 0.201039 | 0.220135 | 0.687929 | Inactive |
| 11 | AM054       | 0.973953 | 0.951481 | 0.840147 | 0.990882 | Inactive |
| 12 | AM054       | 0.973953 | 0.951481 | 0.840147 | 0.990882 | Inactive |
| 13 | AM056       | 0.973953 | 0.951481 | 0.840147 | 0.990882 | Inactive |
| 14 | AM056       | 0.973953 | 0.951481 | 0.840147 | 0.990882 | Inactive |
| 15 | AM057       | 0.973953 | 0.951481 | 0.840147 | 0.990882 | Inactive |
| 16 | AM080       | 0.29542  | 0.312935 | 0.357    | 0.962855 | Inactive |
| 17 | AC004       | 0.98703  | 0.855442 | 0.994864 | 0.879907 | Moderate |
| 18 | AC010       | 0.957765 | 0.954347 | 0.92282  | 0.955923 | Moderate |
| 19 | AC012       | 0.968477 | 0.972872 | 0.960112 | 0.800413 | Moderate |
| 20 | AC014       | 0.864613 | 0.988576 | 0.948761 | 0.969593 | Moderate |
| 21 | AC016       | 0.015888 | 0.495793 | 0.602327 | 0.564297 | Moderate |
| 22 | AC023       | 0.959196 | 0.923104 | 0.784099 | 0.968428 | Inactive |
| 23 | AC027       | 0.987427 | 0.941515 | 0.860259 | 0.982507 | Inactive |
| 24 | CG106       | 0.22051  | 0.482973 | 0.265691 | 0.963187 | Inactive |
| 25 | CG108       | 0.850859 | 0.796238 | 0.949868 | 0.956023 | Moderate |
| 26 | AC033       | 0.976578 | 0.979627 | 0.974184 | 0.767305 | Inactive |
| 27 | AC044       | 0.795491 | 0.618753 | 0.528143 | 0.930132 | Inactive |
| 28 | AC052       | 0.812415 | 0.970408 | 0.975954 | 0.959967 | Moderate |
| 29 | AC061       | 0.384145 | 0.317166 | 0.996089 | 0.618574 | Active   |
| 30 | AC068       | 0.720327 | 0.061557 | 0.613571 | 0.47946  | Inactive |
| 31 | AC092       | 0.625804 | 0.830321 | 0.17809  | 0.32794  | Moderate |
| 32 | AC093       | 0.071158 | 0.685921 | 0.939931 | 0.434535 | Moderate |
| 33 | AC098       | 0.129303 | 0.051769 | 0.90818  | 0.982267 | Moderate |
| 34 | AC105       | 0.154034 | 0.448104 | 0.845114 | 0.574054 | Active   |
| 35 | CG008       | 0.042355 | 0.046759 | 0.733485 | 0.036279 | Active   |
| 36 | CG013       | 0.018732 | 0.034463 | 0.896256 | 0.014484 | Active   |
| 37 | CG015       | 0.028916 | 0.887116 | 0.036391 | 0.028687 | Active   |
| 38 | CG019       | 0.019219 | 0.015416 | 0.044378 | 0.823456 | Moderate |
| 39 | CG026       | 0.931867 | 0.020498 | 0.009128 | 0.031542 | Active   |
| 40 | CG035       | 0.020549 | 0.020641 | 0.772693 | 0.031912 | Active   |

|    | CODES INPUT |          |          |          |          | OUTPUT   |
|----|-------------|----------|----------|----------|----------|----------|
|    | CODE        | P1       | P2       | P3       | P4       | NNE3A    |
| 41 | CG036       | 0.034542 | 0.042274 | 0.676817 | 0.020171 | Active   |
| 42 | CG059       | 0.92735  | 0.027111 | 0.04786  | 0.013748 | Active   |
| 43 | CG060       | 0.740186 | 0.008658 | 0.004119 | 0.080253 | Active   |
| 44 | CG062       | 0.01724  | 0.027607 | 0.83982  | 0.0232   | Active   |
| 45 | CG067       | 0.081005 | 0.846374 | 0.013299 | 0.022367 | Active   |
| 46 | CG069       | 0.018708 | 0.779637 | 0.037718 | 0.026537 | Active   |
| 47 | CG072       | 0.11462  | 0.740787 | 0.069565 | 0.752178 | Moderate |
| 48 | CG073       | 0.017942 | 0.804116 | 0.008505 | 0.058193 | Moderate |
| 49 | CG074       | 0.036371 | 0.004972 | 0.827688 | 0.08324  | Active   |
| 50 | CG086       | 0.856686 | 0.029058 | 0.027358 | 0.021996 | Active   |
| 51 | CG088       | 0.999013 | 0.907471 | 0.994804 | 0.815858 | Moderate |
| 52 | CG090       | 0.874682 | 0.228732 | 0.002806 | 0.001513 | Moderate |
| 53 | CG093       | 0.054696 | 0.052219 | 0.597347 | 0.053933 | Active   |
| 54 | CG099       | 0.92136  | 0.929339 | 0.228564 | 0.026661 | Active   |
| 55 | CG101       | 0.776965 | 0.951308 | 0.956743 | 0.932058 | Moderate |
| 56 | AE009       | 0.948169 | 0.786233 | 0.985223 | 0.012486 | Moderate |
| 57 | AE010       | 0.951684 | 0.523389 | 0.484239 | 0.873251 | Inactive |
| 58 | AE084       | 0.979397 | 0.96467  | 0.854025 | 0.016546 | Moderate |
| 59 | EF016       | 0.647869 | 0.976075 | 0.985607 | 0.735824 | Moderate |
| 60 | EF017       | 0.252488 | 0.016913 | 0.0174   | 0.036694 | Active   |
| 61 | EF019       | 0.993096 | 0.831279 | 0.949672 | 0.551415 | Inactive |
| 62 | AM094       | 0.698238 | 0.783135 | 0.587045 | 0.982615 | Moderate |
| 63 | AM096       | 0.994103 | 0.968392 | 0.987458 | 0.756826 | Inactive |
| 64 | AM0101      | 0.387532 | 0.2381   | 0.466592 | 0.514519 | Moderate |
| 65 | AM106       | 0.983981 | 0.055363 | 0.982152 | 0.011205 | Moderate |
| 66 | TC2.30      | 0.252344 | 0.784158 | 0.162189 | 0.638304 | Moderate |
| 67 | TC2.41      | 0.940325 | 0.732683 | 0.98625  | 0.986903 | Moderate |
| 68 | TC2.42      | 0.994182 | 0.976292 | 0.967515 | 0.121537 | Moderate |
| 69 | TC2.43      | 0.94305  | 0.976532 | 0.667627 | 0.972141 | Moderate |
| 70 | TC2.44      | 0.97079  | 0.084121 | 0.824111 | 0.772783 | Moderate |
| 71 | TC2.45      | 0.943329 | 0.992825 | 0.805749 | 0.95616  | Moderate |
| 72 | TC2.47      | 0.958718 | 0.989111 | 0.757928 | 0.99801  | Moderate |
| 73 | TC2.51      | 0.988615 | 0.918291 | 0.826508 | 0.849174 | Inactive |
| 74 | TC3.1       | 0.632092 | 0.899358 | 0.742268 | 0.995395 | Moderate |
| 75 | TC3.9       | 0.945494 | 0.955056 | 0.9949   | 0.999908 | Moderate |
| 76 | TC3.13      | 0.998352 | 0.993675 | 0.9649   | 0.998837 | Moderate |
| 77 | TC3.14      | 0.899312 | 0.955049 | 0.999132 | 0.144836 | Moderate |
| 78 | TC3.16      | 0.815661 | 0.989187 | 0.99608  | 0.725864 | Moderate |
| 79 | TC3.17      | 0.96266  | 0.640989 | 0.973966 | 0.996762 | Moderate |
| 80 | TC3.22      | 0.933247 | 0.990717 | 0.655515 | 0.694386 | Moderate |
| 81 | TC3.23      | 0.958243 | 0.724496 | 0.824042 | 0.700614 | Inactive |
| 82 | TC3.24      | 0.999257 | 0.927163 | 0.989845 | 0.930332 | Moderate |
| 83 | TC3.28      | 0.912148 | 0.860432 | 0.872921 | 0.956881 | Moderate |
| 84 | TC3.29      | 0.892964 | 0.993092 | 0.920857 | 0.960428 | Moderate |

|     | CODES INPUT |          |          |          |          | OUTPUT   |
|-----|-------------|----------|----------|----------|----------|----------|
|     | CODE        | P1       | P2       | P3       | P4       | NNE3A    |
| 85  | TC3.30      | 0.997316 | 0.584151 | 0.616186 | 0.991131 | Inactive |
| 86  | TC3.32      | 0.957181 | 0.847148 | 0.576076 | 0.996173 | Moderate |
| 87  | TC3.36      | 0.718472 | 0.489575 | 0.998227 | 0.988654 | Moderate |
| 88  | TC3.47      | 0.792155 | 0.86635  | 0.965556 | 0.977626 | Moderate |
| 89  | S016        | 0.995007 | 0.995483 | 0.983526 | 0.819976 | Moderate |
| 90  | S015        | 0.091647 | 0.141366 | 0.670239 | 0.935058 | Inactive |
| 91  | S022        | 0.82943  | 0.401508 | 0.34919  | 0.20511  | Moderate |
| 92  | S023        | 0.81734  | 0.849885 | 0.891995 | 0.906192 | Moderate |
| 93  | S025        | 0.9934   | 0.966413 | 0.981011 | 0.64557  | Inactive |
| 94  | S026        | 0.920309 | 0.226057 | 0.815886 | 0.304833 | Inactive |
| 95  | S027        | 0.895419 | 0.961495 | 0.956591 | 0.966145 | Moderate |
| 96  | S028        | 0.131616 | 0.818974 | 0.06542  | 0.668761 | Moderate |
| 97  | S029        | 0.50798  | 0.988891 | 0.99259  | 0.77189  | Moderate |
| 98  | S033        | 0.942765 | 0.915024 | 0.26918  | 0.126082 | Active   |
| 99  | S035        | 0.812543 | 0.54843  | 0.937858 | 0.418083 | Inactive |
| 100 | S037        | 0.131658 | 0.841031 | 0.352617 | 0.385105 | Moderate |
| 101 | S038        | 0.7339   | 0.962824 | 0.636369 | 0.994711 | Moderate |
| 102 | S041        | 0.996458 | 0.992694 | 0.769943 | 0.863159 | Moderate |
| 103 | S043        | 0.487171 | 0.884561 | 0.98331  | 0.964499 | Active   |
| 104 | S045        | 0.916335 | 0.970672 | 0.989132 | 0.96047  | Moderate |
| 105 | S047        | 0.983357 | 0.838205 | 0.994765 | 0.782272 | Moderate |
| 106 | S048        | 0.990416 | 0.922879 | 0.997135 | 0.960594 | Moderate |
| 107 | S049        | 0.926405 | 0.774995 | 0.798642 | 0.129012 | Inactive |
| 108 | VP0.1       | 0.703623 | 0.027812 | 0.004    | 0.107048 | Active   |
| 109 | SC003       | 0.994097 | 0.968727 | 0.90412  | 0.775071 | Inactive |
| 110 | SC004a      | 0.983341 | 0.820646 | 0.736874 | 0.910604 | Inactive |
| 111 | SC004b      | 0.983341 | 0.820646 | 0.736874 | 0.910604 | Moderate |
| 112 | SC004c      | 0.983341 | 0.820646 | 0.736874 | 0.910604 | Moderate |
| 113 | SC004d      | 0.983341 | 0.820646 | 0.736874 | 0.910604 | Moderate |
| 114 | SC005       | 0.865749 | 0.185696 | 0.097944 | 0.779632 | Active   |
| 115 | SC006       | 0.750098 | 0.567481 | 0.831145 | 0.154949 | Inactive |
| 116 | SC007a      | 0.385744 | 0.992295 | 0.038351 | 0.011149 | Active   |
| 117 | SC007b      | 0.923743 | 0.983726 | 0.882052 | 0.965654 | Moderate |
| 118 | SC007c      | 0.018269 | 0.000221 | 0.517114 | 0.007859 | Active   |
| 119 | SC007d      | 0.018269 | 0.000221 | 0.517114 | 0.007859 | Active   |
| 120 | SC008       | 0.865749 | 0.185696 | 0.097944 | 0.779632 | Active   |
| 121 | SC009       | 0.750098 | 0.567481 | 0.831145 | 0.154949 | Inactive |
| 122 | SC013       | 0.385744 | 0.992295 | 0.038351 | 0.011149 | Active   |
| 123 | SC013       | 0.385744 | 0.992295 | 0.038351 | 0.011149 | Moderate |
| 124 | SC015a      | 0.923743 | 0.983726 | 0.882052 | 0.965654 | Moderate |
| 125 | SC015b      | 0.923743 | 0.983726 | 0.882052 | 0.965654 | Moderate |
| 126 | SC016       | 0.018269 | 0.000221 | 0.517114 | 0.007859 | Active   |
| 127 | SC018       | 0.942095 | 0.968073 | 0.944532 | 0.859359 | Moderate |
| 128 | SC019       | 0.843217 | 0.914222 | 0.987228 | 0.945192 | Moderate |



|     | CODES INPUT   |          |          |          |          | OUTPUT   |
|-----|---------------|----------|----------|----------|----------|----------|
|     | CODE          | P1       | P2       | P3       | P4       | NNE3A    |
| 129 | SC109a        | 0.975144 | 0.959479 | 0.960841 | 0.980686 | Moderate |
| 130 | SC109b        | 0.975144 | 0.959479 | 0.960841 | 0.980686 | Moderate |
| 131 | SC023         | 0.621918 | 0.697046 | 0.972368 | 0.737418 | Active   |
| 132 | SC024         | 0.98822  | 0.852607 | 0.135973 | 0.062941 | Active   |
| 133 | SC025         | 0.629357 | 0.964304 | 0.874849 | 0.187881 | Inactive |
| 134 | SC027a        | 0.916217 | 0.432778 | 0.131367 | 0.473901 | Moderate |
| 135 | SC027b        | 0.916217 | 0.432778 | 0.131367 | 0.473901 | Moderate |
| 136 | SC030         | 0.053888 | 0.02107  | 0.455218 | 0.009373 | Active   |
| 137 | SC031         | 0.902784 | 0.891084 | 0.736955 | 0.532509 | Inactive |
| 138 | SC034         | 0.475867 | 0.005765 | 0.003716 | 0.019339 | Active   |
| 139 | SC035         | 0.602799 | 0.035635 | 0.051793 | 0.129587 | Moderate |
| 140 | SC036         | 0.995584 | 0.984071 | 0.988153 | 0.993025 | Moderate |
| 141 | SC037         | 0.136507 | 0.101676 | 0.749694 | 0.021657 | Active   |
| 142 | SC038         | 0.996162 | 0.984482 | 0.964425 | 0.96959  | Moderate |
| 143 | SC039         | 0.967461 | 0.951828 | 0.911369 | 0.760654 | Inactive |
| 144 | SC040         | 0.648571 | 0.833029 | 0.09525  | 0.903295 | Moderate |
| 145 | SC041         | 0.826721 | 0.86411  | 0.992027 | 0.865264 | Moderate |
| 146 | SC042         | 0.994695 | 0.920104 | 0.959523 | 0.982524 | Moderate |
| 147 | SC043         | 0.152471 | 0.00729  | 0.546227 | 0.000841 | Active   |
| 148 | SC044         | 0.839709 | 0.649083 | 0.354361 | 0.933078 | Inactive |
| 149 | SC045         | 0.960413 | 0.521084 | 0.898102 | 0.998129 | Inactive |
| 150 | <b>VP1.16</b> | 0.009814 | 0.798164 | 0.145732 | 0.003521 | Active   |
| 151 | SC046         | 0.11147  | 0.056888 | 0.058049 | 0.659519 | Moderate |
| 152 | SC047         | 0.778927 | 0.892843 | 0.881091 | 0.99175  | Moderate |
| 153 | SC048         | 0.05953  | 0.60935  | 0.029967 | 0.032362 | Moderate |
| 154 | SC049         | 0.602799 | 0.035635 | 0.051793 | 0.129587 | Moderate |
| 155 | SC050         | 0.05953  | 0.60935  | 0.029967 | 0.032362 | Moderate |
| 156 | SC051         | 0.11147  | 0.056888 | 0.058049 | 0.659519 | Moderate |
| 157 | SC052         | 0.386625 | 0.953441 | 0.288397 | 0.947091 | Moderate |
| 158 | SC054         | 0.475867 | 0.005765 | 0.003716 | 0.019339 | Active   |
| 159 | SC055         | 0.152471 | 0.00729  | 0.546227 | 0.000841 | Active   |
| 160 | SC056         | 0.960413 | 0.521084 | 0.898102 | 0.998129 | Inactive |
| 161 | SC057         | 0.562126 | 0.349673 | 0.087205 | 0.820645 | Inactive |
| 162 | SC059         | 0.897659 | 0.409392 | 0.994277 | 0.984534 | Inactive |
| 163 | SC070         | 0.993678 | 0.998652 | 0.99696  | 0.983607 | Moderate |
| 164 | SC074         | 0.705914 | 0.004215 | 0.17499  | 0.003067 | Moderate |
| 165 | SC083a        | 0.163234 | 0.791742 | 0.128304 | 0.946791 | Moderate |
| 166 | SC083b        | 0.589843 | 0.63512  | 0.977338 | 0.931913 | Active   |
| 167 | SC084         | 0.475595 | 0.994351 | 0.600943 | 0.73035  | Moderate |
| 168 | SC086         | 0.475595 | 0.994351 | 0.600943 | 0.73035  | Moderate |
| 169 | SC089a        | 0.976649 | 0.969413 | 0.966917 | 0.867704 | Moderate |
| 170 | SC089b        | 0.976649 | 0.969413 | 0.966917 | 0.867704 | Moderate |
| 171 | SC090a        | 0.103711 | 0.93235  | 0.235906 | 0.596884 | Moderate |
| 172 | SC090b        | 0.103711 | 0.93235  | 0.235906 | 0.596884 | Moderate |

|     | CODES INPUT |          |          |          |          | OUTPUT   |
|-----|-------------|----------|----------|----------|----------|----------|
|     | CODE        | P1       | P2       | P3       | P4       | NNE3A    |
| 173 | SC091a      | 0.993096 | 0.939206 | 0.986876 | 0.879903 | Moderate |
| 174 | SC091b      | 0.993096 | 0.939206 | 0.986876 | 0.879903 | Moderate |
| 175 | SC093a      | 0.892427 | 0.442443 | 0.756128 | 0.18351  | Inactive |
| 176 | SC093b      | 0.892427 | 0.442443 | 0.756128 | 0.18351  | Inactive |
| 177 | SC094a      | 0.207088 | 0.638318 | 0.07177  | 0.939913 | Moderate |
| 178 | SC094b      | 0.207088 | 0.638318 | 0.07177  | 0.939913 | Moderate |
| 179 | SC096       | 0.565474 | 0.437244 | 0.072731 | 0.94398  | Moderate |
| 180 | SC103       | 0.462694 | 0.701835 | 0.135976 | 0.931421 | Inactive |
| 181 | SC113       | 0.201281 | 0.764014 | 0.737779 | 0.49553  | Moderate |
| 182 | SC114       | 0.988207 | 0.971045 | 0.945724 | 0.159186 | Inactive |
| 183 | SC115       | 0.953313 | 0.909668 | 0.956284 | 0.942964 | Moderate |
| 184 | SC116       | 0.901485 | 0.588961 | 0.701257 | 0.553794 | Inactive |
| 185 | SC118       | 0.809545 | 0.130194 | 0.243296 | 0.455275 | Moderate |
| 186 | SC119       | 0.006865 | 0.21455  | 0.570236 | 0.03064  | Active   |
| 187 | SC120       | 0.194914 | 0.481644 | 0.925033 | 0.270904 | Moderate |
| 188 | CO1101      | 0.960446 | 0.879399 | 0.907751 | 0.978067 | Moderate |
| 189 | CO1102      | 0.989246 | 0.983634 | 0.93894  | 0.811026 | Inactive |
| 190 | CO1103      | 0.990117 | 0.936669 | 0.854229 | 0.989988 | Inactive |
| 191 | CO1104      | 0.837912 | 0.945261 | 0.972918 | 0.959639 | Moderate |
| 192 | CO1105      | 0.953594 | 0.939595 | 0.871896 | 0.964808 | Moderate |
| 193 | CO1106      | 0.992762 | 0.964211 | 0.942656 | 0.996925 | Moderate |
| 194 | CO2103      | 0.110622 | 0.258619 | 0.698966 | 0.824974 | Moderate |
| 195 | CO2106      | 0.148093 | 0.732172 | 0.224327 | 0.741617 | Moderate |
| 196 | CO2107      | 0.052539 | 0.984946 | 0.001294 | 0.003892 | Active   |
| 197 | CO2109      | 0.234712 | 0.181612 | 0.116858 | 0.872373 | Inactive |
| 198 | CO2110      | 0.950512 | 0.061935 | 0.001056 | 0.000506 | Active   |
| 199 | CO2301      | 0.020459 | 0.892987 | 0.039398 | 0.824574 | Moderate |
| 200 | CO2302      | 0.965779 | 0.932472 | 0.976835 | 0.953736 | Moderate |
| 201 | CO4002      | 0.965779 | 0.932472 | 0.976835 | 0.953736 | Moderate |
| 202 | SC122       | 0.941895 | 0.887017 | 0.925845 | 0.952871 | Moderate |
| 203 | SC126       | 0.270483 | 0.951403 | 0.895671 | 0.07501  | Active   |
| 204 | SC132       | 0.712161 | 0.082149 | 0.432934 | 0.946884 | Inactive |
| 205 | SC130       | 0.194914 | 0.481644 | 0.925033 | 0.270904 | Moderate |
| 206 | SC127       | 0.270483 | 0.951403 | 0.895671 | 0.07501  | Moderate |
| 207 | SC133       | 0.111566 | 0.882579 | 0.630823 | 0.230165 | Inactive |
| 208 | SC134       | 0.999757 | 0.654171 | 0.841588 | 0.998497 | Inactive |
| 209 | SC138       | 0.859402 | 0.175321 | 0.278504 | 0.959012 | Inactive |
| 210 | SC139       | 0.988597 | 0.179453 | 0.120231 | 0.828116 | Active   |
| 211 | SC140       | 0.912975 | 0.980572 | 0.97316  | 0.850134 | Moderate |
| 212 | SC141       | 0.131606 | 0.082863 | 0.656117 | 0.718082 | Moderate |
| 213 | SC142       | 0.110833 | 0.820911 | 0.415595 | 0.980798 | Moderate |
| 214 | SC143       | 0.160825 | 0.074056 | 0.95419  | 0.888182 | Moderate |
| 215 | SC145       | 0.036413 | 0.039982 | 0.672389 | 0.901072 | Inactive |
| 216 | SC154       | 0.45842  | 0.972553 | 0.143912 | 0.89637  | Moderate |

|     | CODES INPUT     |          |          |          |          | OUTPUT   |
|-----|-----------------|----------|----------|----------|----------|----------|
|     | CODE            | P1       | P2       | P3       | P4       | NNE3A    |
| 217 | SC155           | 0.111566 | 0.882579 | 0.630823 | 0.230165 | Inactive |
| 218 | SC156           | 0.788695 | 0.990721 | 0.997533 | 0.804252 | Moderate |
| 219 | SC159           | 0.955765 | 0.972385 | 0.804334 | 0.987875 | Inactive |
| 220 | SV047           | 0.989768 | 0.848763 | 0.941183 | 0.964177 | Moderate |
| 221 | <b>Rolipram</b> | 0.641492 | 0.694212 | 0.560717 | 0.276594 | Inactive |
| 222 | <b>MR1.51</b>   | 0.065314 | 0.045325 | 0.792774 | 0.024013 | Active   |

**Table S8.** Experimental results of the compounds from virtual screening

|    | CODE               | % inhibition of PDE7A @10 $\mu$ M | Purity by HPLC     |
|----|--------------------|-----------------------------------|--------------------|
| 1  | AC105              | 18.43                             | >99%               |
| 2  | AM047              | 60.00                             | 97.96%             |
| 3  | CG015              | 24.83                             | 96.32%             |
| 4  | CG062              | 2.89                              | >99%               |
| 5  | CG060              | 7.36                              | >99%               |
| 6  | CG067              | 12.51                             | >99%               |
| 7  | CG069              | 17.96                             | >99%               |
| 8  | CG074              | 10.12                             | >99%               |
| 9  | CG093              | 22.52                             | 95.24%             |
| 10 | EF17A              | 23.82                             | >99%               |
| 11 | VP0.1 <sup>a</sup> | 72.40                             | >99%               |
| 12 | SC005              | 18.42                             | >99%               |
| 13 | SC007a             | 3.73                              | 98.85%             |
| 14 | SC008              | 10.09                             | >99%               |
| 15 | S033               | 2.10                              | 95.73%             |
| 16 | SC034              | 7.22                              | 96.25%             |
| 17 | SC055              | 1.68                              | 99.00%             |
| 18 | SC083              | 8.30                              | 98.43%             |
| 19 | SC119              | 51.07                             | >99%               |
| 20 | SC126              | 7.06                              | >99%               |
| 21 | VP1.16             | 82.00                             | N. D. <sup>b</sup> |

<sup>a</sup> <sup>1</sup>H-NMR (400MHz, acetone-*d*<sub>6</sub>):  $\delta$  11.23 (s, 1H), 4.25 (t, *J* = 6.5 Hz, 2H), 3.73 (t, *J* = 6.6 Hz, 2H), 3.01 – 2.92 (m, 1H), 2.76 – 2.62 (m, 4H), 2.30 – 2.12 (m, 2H), 1.95 – 1.83 (m, 2H), 1.82 – 1.71 (m, 2H), 1.43 – 1.25 (m, 2H), 1.06 (d, *J* = 6.5 Hz, 3H), 1.02 (t, *J* = 7.4 Hz, 3H).

<sup>13</sup>C-NMR (100MHz, acetone-*d*<sub>6</sub>):  $\delta$  168.89, 166.25, 147.68, 130.44, 126.01, 111.25, 66.16, 44.31, 33.28, 32.20, 31.19, 28.20, 26.28, 22.04, 20.96, 10.34.

<sup>b</sup> The purity of compound VP 1.16 was determined by elemental analysis and its structural characterization is reported in *J. Med. Chem.* **2012**, *55*, 1645-1661

## References

1. Pitts, W. J., Vaccaro, W., Huynh, T., Leftheris, K., Roberge, J. Y., Barbosa, J., Guo, J., Brown, B., Watson, A., Donaldson, K., Starling, G. C., Kiener, P. A., Poss, M. A., Dodd, J. H., and Barrish, J. C. (2004) Identification of purine inhibitors of phosphodiesterase 7 (PDE7). *Bioorg. Med. Chem. Lett.* *14*, 2955-2958.
2. Smith, S. J., Cieslinski, L. B., Newton, R., Donnelly, L. E., Fenwick, P. S., Nicholson, A. G., Barnes, P. J., Barnette, M. S., and Giembycz, M. A. (2004) Discovery of BRL 50481 [3-(N,N-dimethylsulfonamido)-4-methyl-nitrobenzene], a selective inhibitor of phosphodiesterase 7: in vitro studies in human monocytes, lung macrophages, and CD8+ T-lymphocytes. *Mol. Pharmacol.* *66*, 1679-1689.
3. Grundler, G., Gutterer, B., Hatzelmann, A., Stadlwieser, J., Sterk, G., and Weinbrenner, S. (2002) (Dihydro)isoquinoline derivatives as phosphodiesterase inhibitors. BYK Gulden Lomberg Chemische Fabrik. BMBH WO0240450.
4. Grundler, G., Gutterer, B., Hatzelmann, A., Stadlwieser, J., Sterk, G., and Weinbrenner, S. (2002) Dihydroisoquinolines as novel phosphodiesterase inhibitors. BKY Gulden Lomberg Chemische Fabrik. GMBH WO0240449.
5. Lorthiois, E., Bernardelli, P., Vergne, F., Oliveira, C., Mafroud, A. K., Proust, E., Heuze, L., Moreau, F., Idrissi, M., Tertre, A., Bertin, B., Coupe, M., Wrigglesworth, R., Descours, A., Soulard, P., and Berna, P. (2004) Spiroquinazolinones as novel, potent, and selective PDE7 inhibitors. Part 1. *Bioorg. Med. Chem. Lett.* *14*, 4623-4626.
6. Bernardelli, P., Vergne, F., Mendes, C., and Ducrot, P. (2004) New Spirocondensed quinazolinones and their use as phosphodiesterase inhibitors. Warner-lambert, WO2004/026818.

7. Vergne, F., Bernardelli, P., Lorthiois, E., Pham, N., Proust, E., Oliveira, C., Mafroud, A. K., Royer, F., Wrigglesworth, R., Schellhaas, J., Barvian, M., Moreau, F., Idrissi, M., Tertre, A., Bertin, B., Coupe, M., Berna, P., and Soulard, P. (2004) Discovery of thiadiazoles as a novel structural class of potent and selective PDE7 inhibitors. Part 1: design, synthesis and structure-activity relationship studies. *Bioorg. Med. Chem. Lett.* *14*, 4607-4613.
8. Jones, N. A., Leport, M., Holand, T., Vos, T., Morgan, M., Fink, M., Pruniaux, M. P., Berthelie, C., O'Connor, B. J., Bertrand, C., and Page, C. P. (2007) Phosphodiesterase (PDE) 7 in inflammatory cells from patients with asthma and COPD. *Pulm. Pharmacol. Ther.* *20*, 60-68.
9. Yamamoto, S., Sugahara, S., Ikeda, K., and Shimizu, Y. (2006) Pharmacological profile of a novel phosphodiesterase 7A and -4 dual inhibitor, YM-393059, on acute and chronic inflammation models. *Eur. J. Pharmacol.* *550*, 166-172.
10. Pitts, W. J., Watson, A. J., and Dodd, J. H. (2002) Dual inhibitors of PDE7 and PDE4. Bristol-Myers Squibb Company. WO02088080.
11. Castaño, T., Wang, H., Campillo, N. E., Ballester, S., Gonzalez-Garcia, C., Hernandez, J., Perez, C., Cuenca, J., Perez-Castillo, A., Martinez, A., Huertas, O., Gelpi, J. L., Luque, F. J., Ke, H., and Gil, C. (2009) Synthesis, structural analysis, and biological evaluation of thioxoquinazoline derivatives as phosphodiesterase 7 inhibitors. *ChemMedChem* *4*, 866-876.
12. Vergne, F., Bernardelli, P., Lorthiois, E., Pham, N., Proust, E., Oliveira, C., Mafroud, A. K., Ducrot, P., Wrigglesworth, R., Berlioz-Seux, F., Coleon, F., Chevalier, E., Moreau, F., Idrissi, M., Tertre, A., Descours, A., Berna, P., and Li, M. (2004) Discovery of thiadiazoles as a novel structural class of potent and selective PDE7

inhibitors. Part 2: metabolism-directed optimization studies towards orally bioavailable derivatives. *Bioorg. Med. Chem. Lett.* 14, 4615-4621.
